# Supplementary material for: Automated discovery of noncovalent inhibitors of SARS-CoV-2 main protease by consensus Deep Docking of 40 billion small molecules
Source: Royal Society of Chemistry journal article supplement (doi:10.1039/d1sc05579h), 2021-01-01
Supplement: d1sc05579h2.xlsx [file d1sc05579h2.xlsx]

## Sheet: Table_S1
name	SMILES	Alternate_name	activity_data_SMILES	canonical_CID	r_inhibition_at_20_uM	r_inhibition_at_50_uM	r_avg_IC50	f_inhibition_at_20_uM	f_inhibition_at_50_uM	f_avg_IC50	f_avg_pIC50	relative_solubility_at_20_uM	relative_solubility_at_100_uM	trypsin_IC50	NMR_std_ratio	acrylamide	chloroacetamide	series	frag_id
7KX5	O=C(N[C@@H](C)c1ccccc1)[C@H](N(C(=O)c1occc1)c1ccc(-c2ccccc2)cc1)c1cnccc1
4_mpro-x12423_0a_bound.pdb	Clc1cc(CN(C(=O)Cn2nnc3c2cccc3)c2ccc(N(C)C)cc2)ccc1	ALP-POS-6d04362c-2	Clc1cc(CN(C(=O)Cn2nnc3c2cccc3)c2ccc(N(C)C)cc2)ccc1	ALP-POS-6d04362c-2			0.391491			0.496759	6.30385					FALSE	FALSE	3-aminopyridine-like	x12423
mpro-n0066_0b_bound.pdb	Clc1cc([C@H]2C(=O)N(c3c4c(cnc3)cccc4)CC2)ccc1
6M2N	O=C1c2c(O)c(O)c(O)cc2OC(c2ccccc2)=C1
3_mpro-x10789_0a_bound.pdb	Clc1cc(O[C@H]2NC(=O)C2)cc(CC(=O)Nc2c(C)ccnc2)c1	TRY-UNI-2eddb1ff-7	Clc1cc(OC2NC(=O)C2)cc(CC(=O)Nc2c(C)ccnc2)c1	TRY-UNI-2eddb1ff-7		87.1913	0.940749	94.4703	97.0056	3.60986	5.44251	0.99	1	99	304.017	FALSE	FALSE	3-aminopyridine-like	x10789
mpro-n0029_0a_bound.pdb	Clc1cc(OCCNC(=O)C=2c3c(NC(=O)C=2)cccc3)cc(O[C@@H]2NC(=O)C2)c1
4_mpro-x12419_0a_bound.pdb	O=C(N(Cc1ccccc1)c1ccc(N(C)C)cc1)Cn1nnc2c1cccc2	ALP-POS-6d04362c-1	O=C(N(Cc1ccccc1)c1ccc(N(C)C)cc1)Cn1nnc2c1cccc2	ALP-POS-6d04362c-1			1.56502			5.05327	5.29643					FALSE	FALSE	3-aminopyridine-like	x12419
7JU7	O=C(Nc1cc(/N=C/2\SC=C(c3cnccc3)N\2)c(C)cc1)c1ccc(C[N+H]2CC[N+H](C)CC2)cc1
7L0D	O=C(NC(C)(C)C)[C@H](N(C(=O)c1occc1)C1CCC(C(C)(C)C)CC1)[C@@H]1C[N+H2]CCC1
2_mpro-x10236_0a_bound.pdb	Clc1cc(N(C(=O)Nc2cnccc2)CCC2CCCCC2)ccc1	JOR-UNI-2fc98d0b-12	Clc1cc(N(C(=O)Nc2cnccc2)CCC2CCCCC2)ccc1	JOR-UNI-2fc98d0b-12		78.9447	3.30036	83.3306	88.7917	3.05667	5.51475			99		FALSE	FALSE	3-aminopyridine-like	x10236
mpro-n0050_0a_bound.pdb	Fc1cc(CCNC(=O)[C@@H](N(C(=O)c2occc2)c2ccc(C(C)(C)C)cc2)c2cnccc2)ccc1
2_mpro-x2119_0a_bound.pdb	N=Cc1[nH]ccn1	AAR-POS-f650c5f2-2
2_mpro-x2193_0a_bound.pdb	S(=O)(=O)(C)c1ccc(N2CC[N+H2]CC2)cc1	AAR-POS-5507155c-1	S(=O)(=O)(C)c1ccc(N2CCNCC2)cc1	AAR-POS-5507155c-1			83.776	-2.5168	5.04708	99.5					0	FALSE	FALSE		x2193
2_mpro-x2540_0a_bound.pdb	O=C(NC(C)(C)C)[C@H](N(C(=O)CC)c1noc(C(C)(C)C)c1)c1cnccc1	LON-WEI-b8d98729-23	O=C(N(C(C(=O)NC(C)(C)C)c1cnccc1)c1noc(C(C)(C)C)c1)C=C	LON-WEI-b8d98729-23	28.6714			7.85931	16.1371	99		0.98	0.91	99		TRUE	FALSE	Ugi
2_mpro-x2563_0a_bound.pdb	O=C(Nc1ccccc1)Cc1c2c(cnc1)cccc2	DAR-DIA-23aa0b97-20	O=C(Nc1ccccc1)Cc1c2c(cnc1)cccc2	DAR-DIA-23aa0b97-20	27.82	62.475	45.0775	31.6434	57.7939	57.4697	4.24056	1	0.98	99		FALSE	FALSE	3-aminopyridine-like	x2563
2_mpro-x2694_0a_bound.pdb	O=C(Nc1c(C)cc(OC)cc1)[C@H](N(C(=O)CC)c1noc(C(C)(C)C)c1)c1cnccc1	LON-WEI-b8d98729-43	O=C(N(C(C(=O)Nc1c(C)cc(OC)cc1)c1cnccc1)c1noc(C(C)(C)C)c1)C=C	LON-WEI-b8d98729-43	14.3089			12.8761	23.4313			1	0.91			TRUE	FALSE	Ugi
2_mpro-x2703_0a_bound.pdb	O=C(Nc1c(CC)cccc1C)[C@H](N(C(=O)CC)c1cnc(C(C)C)cc1)c1cnccc1	LON-WEI-b8d98729-18	O=C(N(C(C(=O)Nc1c(CC)cccc1C)c1cnccc1)c1cnc(C(C)C)cc1)C=C	LON-WEI-b8d98729-18	0			5.61327	12.478			1	0.95			TRUE	FALSE	Ugi
2_mpro-x2705_0a_bound.pdb	O=C(Nc1c(CC)cccc1C)[C@H](N(C(=O)CC)c1n[nH]c(C(C)(C)C)c1)c1cnccc1	LON-WEI-b8d98729-20	O=C(N(C(C(=O)Nc1c(CC)cccc1C)c1cnccc1)c1[nH]nc(C(C)(C)C)c1)C=C	LON-WEI-b8d98729-20	0			4.04681	4.70552			0.92	0.78			TRUE	FALSE	Ugi
2_mpro-x2764_0a_bound.pdb	O=C(NCc1csnc1)c1c(OCC#N)cccc1	BAR-COM-4e090d3a-49	O=C(NCc1csnc1)c1c(OCC#N)cccc1	BAR-COM-4e090d3a-49	-4.225	0		2.21357	5.95933			1	1			FALSE	FALSE		x2764
2_mpro-x2776_0a_bound.pdb	O=C(Nc1c(C)cc(OC)cc1)[C@H](N(C(=O)CC)c1ccc([C@@H](OC)C)cc1)c1cnccc1	LON-WEI-b8d98729-8	O=C(N(C(C(=O)Nc1c(C)cc(OC)cc1)c1cnccc1)c1ccc(C(OC)C)cc1)C=C	LON-WEI-b8d98729-8	0			2.90999	6.89989			0.99	0.97			TRUE	FALSE	Ugi
2_mpro-x2910_0a_bound.pdb	O=C(NCCOc1c(OC)cccc1)C=1c2c(NC(=O)C=1)cccc2	MAT-POS-916a2c5a-2	O=C(NCCOc1c(OC)cccc1)C=1c2c(NC(=O)C=1)cccc2	MAT-POS-916a2c5a-2	70.0575	83.785	3.4616	83.736	92.6678	7.234	5.14062	0.99	0.96	99		FALSE	FALSE	quinolones	x2910
2_mpro-x10355_0a_bound.pdb	Fc1cc2NC(=O)C=C(C(=O)NCCOc3c(OC)cccc3)c2cc1	MAT-POS-590ac91e-32	Fc1cc2NC(=O)C=C(C(=O)NCCOc3c(OC)cccc3)c2cc1	MAT-POS-590ac91e-32		9.64127		-6.60251	51.6844	99.5		0.88	0.66	99		FALSE	FALSE	quinolones	x10355
2_mpro-x10403_0a_bound.pdb	O=C(NCCNc1ccccc1)C=1c2c(NC(=O)C=1)cccc2	BEN-DND-7e92b6ca-4	O=C(NCCNc1ccccc1)C=1c2c(NC(=O)C=1)cccc2	BEN-DND-7e92b6ca-4		35.3781		32.0318	61.5736	99.5		1	0.98	99	297.077	FALSE	FALSE	quinolones	x10403
2_mpro-x10419_0a_bound.pdb	O=C(N(CCOc1c(OC)cccc1)C)C=1c2c(NC(=O)C=1)cccc2	BEN-DND-7e92b6ca-2	O=C(N(CCOc1c(OC)cccc1)C)C=1c2c(NC(=O)C=1)cccc2	BEN-DND-7e92b6ca-2		0		12.1322	12.5056			0.99	0.98		0	FALSE	FALSE	quinolones	x10419
3_mpro-x10525_0a_bound.pdb	Fc1cc2C(C(=O)NC[C@H](Oc3c(OC)cccc3)C)=CC(=O)Nc2cc1	MAT-POS-590ac91e-39	Fc1cc2C(C(=O)NCC(Oc3c(OC)cccc3)C)=CC(=O)Nc2cc1	MAT-POS-590ac91e-39		0		19.8489	46.1018			1	0.99		220.046	FALSE	FALSE	quinolones	x10525
3_mpro-x10700_0a_bound.pdb	O=C(NCCOc1c(OC)cccc1)C1=CC(=O)NC=C1	BEN-DND-7e92b6ca-1	O=C(NCCOc1c(OC)cccc1)C1=CC(=O)NC=C1	BEN-DND-7e92b6ca-1		12.98		1.92555	1.7069			1	1		98.2745	FALSE	FALSE		x10700
3_mpro-x10959_0a_bound.pdb	Clc1cc(CC(=O)Nc2c3c(cnc2)cccc3)ccc1	ADA-UCB-6c2cb422-1	Clc1cc(CC(=O)Nc2c3c(cnc2)cccc3)ccc1	ADA-UCB-6c2cb422-1		84.9102	1.05672	93.5042	84.8033	0.728189	6.13776	1	0.86	99	201.462	FALSE	FALSE	3-aminopyridine-like	x10959
3_mpro-x10995_0a_bound.pdb	FC(F)(F)c1nc(CC(=O)Nc2c(CC)ccnc2)ccc1	JAG-UCB-a3ef7265-23	FC(F)(F)c1nc(CC(=O)Nc2c(CC)ccnc2)ccc1	JAG-UCB-a3ef7265-23		0		2.62633	10.0794			0.99	1		80.3503	FALSE	FALSE	3-aminopyridine-like	x10995
3_mpro-x11313_0a_bound.pdb	O=C(NCCOc1c(OC)cccc1)C=1c2c(C)cccc2NC(=O)C=1	EDJ-MED-6af13d92-1	O=C(NCCOc1c(OC)cccc1)C=1c2c(C)cccc2NC(=O)C=1	EDJ-MED-6af13d92-1		89.6519	2.6015	91.8165	96.4363	10.621	4.97383				75.194	FALSE	FALSE	quinolones	x11313
3_mpro-x11366_0a_bound.pdb	Fc1c(N2CCN(C(=O)C=3c4c(NC(=O)C=3)cccc4)CC2)cccc1	BEN-DND-7e92b6ca-16	Fc1c(N2CCN(C(=O)C=3c4c(NC(=O)C=3)cccc4)CC2)cccc1	BEN-DND-7e92b6ca-16		46.379		50.6894	75.5784	23.9996	4.6198	0.98	0.99		163.809	FALSE	FALSE	quinolones	x11366
3_mpro-x11458_0a_bound.pdb	O=C(Nc1c2c(cnc1)cccc2)CC1=CC(=C=C)C=CC1	PET-UNK-c9c1e0d8-2	O=C(Nc1c2c(cnc1)cccc2)Cc1cc(C#C)ccc1	PET-UNK-c9c1e0d8-2						9.38335	5.02764				218.889	FALSE	FALSE	3-aminopyridine-like	x11458
3_mpro-x11498_0a_bound.pdb	Clc1cc2[C@H](C(=O)Nc3c4c(cnc3)cccc4)CCOc2cc1	VLA-UCB-1dbca3b4-15	Clc1cc2C(C(=O)Nc3c4c(cnc3)cccc4)CCOc2cc1	VLA-UCB-1dbca3b4-15			0.42396			0.359483	6.44432				91.3389	FALSE	FALSE	3-aminopyridine-like	x11498
3_mpro-x11499_0a_bound.pdb	Clc1cc(CC(=O)NC=2C=3C(=CNC=2)C=CNC=3)ccc1	MAT-POS-f7918075-5	Clc1cc(CC(=O)Nc2c3c(cnc2)ccnc3)ccc1	MAT-POS-f7918075-5			2.1305			4.27326	5.36924				231.399	FALSE	FALSE	3-aminopyridine-like	x11499
3_mpro-x11501_0a_bound.pdb	Clc1cc(CC(=O)N(C)c2c3c(cnc2)cccc3)ccc1	MAT-POS-bb423b95-7	Clc1cc(CC(=O)N(C)c2c3c(cnc2)cccc3)ccc1	MAT-POS-bb423b95-7			48.1935			34.3682	4.46384				17.2948	FALSE	FALSE	3-aminopyridine-like	x11501
3_mpro-x11508_0a_bound.pdb	Clc1cc(CC(=O)Nc2nncc3c2cccc3)ccc1	EDJ-MED-50fe53e8-1	Clc1cc(CC(=O)Nc2nncc3c2cccc3)ccc1	EDJ-MED-50fe53e8-1						21.6514	4.66451				261.972	FALSE	FALSE	3-aminopyridine-like	x11508
3_mpro-x11530_0a_bound.pdb	Clc1cc(CC(=O)Nc2c3ncccc3cnc2)ccc1	MAT-POS-bb423b95-2	Clc1cc(CC(=O)Nc2c3ncccc3cnc2)ccc1	MAT-POS-bb423b95-2			6.21925			7.01875	5.15374				264.351	FALSE	FALSE	3-aminopyridine-like	x11530
4_mpro-x11541_0a_bound.pdb	O=C(Nc1c2c(cnc1)cccc2)C[N+H]1CCN(C(=O)C)CC1	ALP-POS-6747fa38-1	O=C(Nc1c2c(cnc1)cccc2)CN1CCN(C(=O)C)CC1	ALP-POS-6747fa38-1		42.445	72.5481			71.6881					134.178	FALSE	FALSE	3-aminopyridine-like	x11541
4_mpro-x11542_0a_bound.pdb	Clc1cc(CC(=O)Nc2c3c(cnc2)cncc3)ccc1	MAT-POS-bb423b95-1	Clc1cc(CC(=O)Nc2c3c(cnc2)cncc3)ccc1	MAT-POS-bb423b95-1			3.70893			7.94166	5.10009				278.441	FALSE	FALSE	3-aminopyridine-like	x11542
4_mpro-x11548_0a_bound.pdb	Clc1cc(CC(=O)Nc2c3c(nccc3)cnc2)ccc1	MIC-UNK-08cd9c58-1	Clc1cc(CC(=O)Nc2c3c(nccc3)cnc2)ccc1	MIC-UNK-08cd9c58-1			57.927			67.1124	4.1732				303.56	FALSE	FALSE	3-aminopyridine-like	x11548
4_mpro-x11609_0a_bound.pdb	Clc1cc(CC(=O)Nc2c3c(cnc2)cccc3)c(OC)cc1	MAT-POS-3b92565d-1	Clc1cc(CC(=O)Nc2c3c(cnc2)cccc3)c(OC)cc1	MAT-POS-3b92565d-1		79.31	1.34684			1.20236	5.91997				155.565	FALSE	FALSE	3-aminopyridine-like	x11609
4_mpro-x11616_0a_bound.pdb	FC(F)(F)c1cc(N2CCN(C(=O)C=3c4c(NC(=O)C=3)cccc4)CC2)ccc1	ERI-UCB-a0b0dbcb-4	FC(F)(F)c1cc(N2CCN(C(=O)C=3c4c(NC(=O)C=3)cccc4)CC2)ccc1	ERI-UCB-a0b0dbcb-4		70.965	5.64647			3.79972	5.42025				82.8944	FALSE	FALSE	quinolones	x11616
4_mpro-x11642_0a_bound.pdb	Clc1cc(Oc2nc(OC)ccc2)cc(NC(=O)Cc2c3c(cnc2)cccc3)c1	MAT-POS-6344a35d-1	Clc1cc(Oc2nc(OC)ccc2)cc(NC(=O)Cc2c3c(cnc2)cccc3)c1	MAT-POS-6344a35d-1			1.0039			3.78369	5.42208				0	FALSE	FALSE	3-aminopyridine-like	x11642
4_mpro-x11790_0a_bound.pdb	O=C(N(Cc1cscc1)c1ccc(N(C)C)cc1)Cc1c2c(cnc1)cccc2	PET-UNK-1901c25b-1	O=C(N(Cc1cscc1)c1ccc(N(C)C)cc1)Cc1c2c(cnc1)cccc2	PET-UNK-1901c25b-1			0.834211			0.284634	6.54571				91	FALSE	FALSE	3-aminopyridine-like	x11790
4_mpro-x11813_0a_bound.pdb	O=C(NCCOc1c(OC)cccc1)c1c2c(cnc1)cccc2	MAR-UCB-f313ec4d-2	O=C(NCCOc1c(OC)cccc1)c1c2c(cnc1)cccc2	MAR-UCB-f313ec4d-2			5.78068			3.2413	5.48928				91.3435	FALSE	FALSE		x11813
4_mpro-x11831_0a_bound.pdb	Clc1cc(CC(=O)Nc2c3c(cnc2)cccc3)c2OCCc2c1	MAT-POS-bbbbc21a-3	Clc1cc(CC(=O)Nc2c3c(cnc2)cccc3)c2OCCc2c1	MAT-POS-bbbbc21a-3		78.32	0.4919			1.44887	5.83897				349.783	FALSE	FALSE	3-aminopyridine-like	x11831
4_mpro-x12000_0a_bound.pdb	Clc1cc(CC(=O)Nc2c3c(cnc2)CCC3)ccc1	MAT-POS-199e2e7c-1	Clc1cc(CC(=O)Nc2c3c(cnc2)CCC3)ccc1	MAT-POS-199e2e7c-1			4.64891			5.16341	5.28706				216.851	FALSE	FALSE	3-aminopyridine-like	x12000
4_mpro-x12064_0a_bound.pdb	O=C(N1CC(Oc2c(OC)cccc2)C1)C=1c2c(NC(=O)C=1)cccc2	ERI-UCB-a0b0dbcb-9	O=C(N1CC(Oc2c(OC)cccc2)C1)C=1c2c(NC(=O)C=1)cccc2	ERI-UCB-a0b0dbcb-9			99			99.5					82.8153	FALSE	FALSE	quinolones	x12064
4_mpro-x12073_0a_bound.pdb	Clc1cc2[C@H](C(=O)Nc3c4c(cnc3)cccc4)[C@H](C)COc2cc1	MAT-POS-8a69d52e-7	Clc1cc2[C@H](C(=O)Nc3c4c(cnc3)cccc4)[C@H](C)COc2cc1	MAT-POS-8a69d52e-7			1.82971			1.71349	5.76612				111.513	FALSE	FALSE	3-aminopyridine-like	x12073
4_mpro-x12171_0a_bound.pdb	Clc1cc2[C@H](C(=O)Nc3c4c(cnc3)cccc4)CCNc2cc1	ALP-POS-477dc5b7-2	Clc1cc2C(C(=O)Nc3c4c(cnc3)cccc4)CCNc2cc1	ALP-POS-477dc5b7-2			0.720403			0.258757	6.58711					FALSE	FALSE	3-aminopyridine-like	x12171
4_mpro-x12202_0a_bound.pdb	Clc1cc(CC(=O)N2c3c(c(N)cnc3)CCC2)ccc1	ALP-POS-cd485364-2	Clc1cc(CC(=O)N2c3c(c(N)cnc3)CCC2)ccc1	ALP-POS-cd485364-2			54.2265			32.5061	4.48804					FALSE	FALSE	3-aminopyridine-like	x12202
4_mpro-x12207_0a_bound.pdb	Clc1cc2[C@@](C(=O)Nc3c4c(cnc3)cccc4)(C)CCOc2cc1	EDJ-MED-e4b030d8-13	Clc1cc2[C@@](C(=O)Nc3c4c(cnc3)cccc4)(C)CCOc2cc1	EDJ-MED-e4b030d8-13			0.0907919			0.283626	6.54725					FALSE	FALSE	3-aminopyridine-like	x12207
4_mpro-x12350_0a_bound.pdb	O=C(N(CCCOC(C)C)Cc1occc1)NC=1c2c(C(=O)N(C)C=1)cccc2	MAT-POS-b5746674-38	O=C(N(CCCOC(C)C)Cc1occc1)NC=1c2c(C(=O)N(C)C=1)cccc2	MAT-POS-b5746674-38			99	-0.402556	0.922257							FALSE	FALSE		x12350
4_mpro-x12582_0a_bound.pdb	Clc1cc(N2C(=O)CN(C(=O)c3c4c(cnc3)cccc4)CC2)ccc1	ERI-UCB-d6de1f3c-2	Clc1cc(N2C(=O)CN(C(=O)c3c4c(cnc3)cccc4)CC2)ccc1	ERI-UCB-d6de1f3c-2			5.53266			9.18999	5.03669					FALSE	FALSE
4_mpro-x12587_0a_bound.pdb	Clc1cc([C@H]2C(=O)N(c3c4c(cnc3)cccc4)CCC2)ccc1	PET-UNK-c9c1e0d8-3	Clc1cc(C2C(=O)N(c3c4c(cnc3)cccc4)CCC2)ccc1	PET-UNK-c9c1e0d8-3			0.731634			1.1415	5.94252					FALSE	FALSE	3-aminopyridine-like
4_mpro-x12659_0a_bound.pdb	Clc1cc2[C@H](C(=O)Nc3c4c(cnc3)cncc4)CCOc2cc1	ALP-POS-ce760d3f-2	Clc1cc2[C@@H](C(=O)Nc3c4c(cnc3)cncc4)CCOc2cc1	ALP-POS-ce760d3f-2			1.29106									FALSE	FALSE	3-aminopyridine-like
4_mpro-x12661_0a_bound.pdb	O=C(N(CCC1CCCCC1)Cc1sccc1)Cc1c2c(cnc1)cccc2	ALP-POS-64a710fa-1	O=C(N(CCC1CCCCC1)Cc1sccc1)Cc1c2c(cnc1)cccc2	ALP-POS-64a710fa-1			3.02151			9.86113	5.00607					FALSE	FALSE
4_mpro-x12674_0a_bound.pdb	Clc1ccc([C@H]2C(=O)N(c3c4c(cnc3)cccc4)CCC2)cc1	ALP-POS-ce760d3f-8	Clc1ccc(C2C(=O)N(c3c4c(cnc3)cccc4)CCC2)cc1	ALP-POS-ce760d3f-8			16.5365			78.2094	4.10674					FALSE	FALSE	3-aminopyridine-like
4_mpro-x12677_0a_bound.pdb	Clc1nc(CC(=O)Nc2c3c(cnc2)cccc3)ccc1	MAT-POS-afd4d4fd-2	Clc1nc(CC(=O)Nc2c3c(cnc2)cccc3)ccc1	MAT-POS-afd4d4fd-2			99			40.6504	4.39094					FALSE	FALSE	3-aminopyridine-like
4_mpro-x12679_0a_bound.pdb	Clc1cc(N2C(=O)CN(C(=O)C=3c4c(NC(=O)C=3)cccc4)CC2)ccc1	ERI-UCB-d6de1f3c-1	Clc1cc(N2C(=O)CN(C(=O)C=3c4c(NC(=O)C=3)cccc4)CC2)ccc1	ERI-UCB-d6de1f3c-1			9.61327			15.8212	4.80076					FALSE	FALSE	quinolones
4_mpro-x12686_0a_bound.pdb	Clc1cc2[C@]3(C(=O)N(c4c5c(cnc4)cccc5)C(=O)N3)CCOc2cc1	VLA-UCB-29506327-1	Clc1cc2C3(C(=O)N(c4c5c(cnc4)cccc5)C(=O)N3)CCOc2cc1	VLA-UCB-29506327-1			0.364474			1.316	5.88074					FALSE	FALSE	3-aminopyridine-like
4_mpro-x12695_0a_bound.pdb	Clc1cc2[C@](O)(C(=O)Nc3c4c(cnc3)cccc4)CC(=O)Nc2cc1	MAT-POS-c7771779-1	Clc1cc2C(O)(C(=O)Nc3c4c(cnc3)cccc4)CC(=O)Nc2cc1	MAT-POS-c7771779-1						20.7559	4.68286					FALSE	FALSE	3-aminopyridine-like
4_mpro-x12696_0a_bound.pdb	Clc1cc2[C@H](C(=O)Nc3c4N(C)C(=O)Nc4cnc3)CCOc2cc1	EDG-MED-0e5afe9d-1	Clc1cc2C(C(=O)Nc3c4N(C)C(=O)Nc4cnc3)CCOc2cc1	EDG-MED-0e5afe9d-1						20.6748	4.68456					FALSE	FALSE	3-aminopyridine-like
4_mpro-x12698_0a_bound.pdb	Clc1cc2[C@H](C(=O)Nc3c4c(cnc3)CC[N+H2]C4)CCOc2cc1	BEN-DND-c852c98b-10	Clc1cc2C(C(=O)Nc3c4c(cnc3)CCNC4)CCOc2cc1	BEN-DND-c852c98b-10						6.16251	5.21024					FALSE	FALSE	3-aminopyridine-like
4_mpro-x12699_0a_bound.pdb	Clc1cc2[C@](OC)(C(=O)Nc3c4c(cnc3)cccc4)CCOc2cc1	EDG-MED-0e5afe9d-3	Clc1cc2C(OC)(C(=O)Nc3c4c(cnc3)cccc4)CCOc2cc1	EDG-MED-0e5afe9d-3						0.185607	6.7314					FALSE	FALSE	3-aminopyridine-like
4_mpro-x12710_0a_bound.pdb	Clc1cc2[C@H](C(=O)Nc3c4c(cnc3)cccc4)CCN(C)c2cc1	MIC-UNK-91acba05-6	Clc1cc2C(C(=O)Nc3c4c(cnc3)cccc4)CCN(C)c2cc1	MIC-UNK-91acba05-6						0.442977	6.35362					FALSE	FALSE	3-aminopyridine-like
4_mpro-x12716_0a_bound.pdb	Clc1cc2[C@@](C(=O)Nc3c4c(cnc3)cccc4)(C[N+H3])CCOc2cc1	EDG-MED-971238d3-5	Clc1cc2[C@@](C(=O)Nc3c4c(cnc3)cccc4)(CN)CCOc2cc1	EDG-MED-971238d3-5						5.02057	5.29925					FALSE	FALSE	3-aminopyridine-like
4_mpro-x12723_0a_bound.pdb	Clc1cc2[C@H](C(=O)Nc3c4c(c[n+]([O-])c3)cccc4)CCOc2cc1	EDJ-MED-eff36d94-1	Clc1cc2[C@H](C(=O)Nc3c4c(c[n+]([O-])c3)cccc4)CCOc2cc1	EDJ-MED-eff36d94-1						99.5						FALSE	FALSE	3-aminopyridine-like
4_mpro-x12735_0a_bound.pdb	Clc1cc2[C@H](C(=O)N(C(=O)CC)c3c4c(cnc3)cccc4)CCOc2cc1	MAT-POS-090737b9-1	Clc1cc2C(C(=O)N(C(=O)C=C)c3c4c(cnc3)cccc4)CCOc2cc1	MAT-POS-090737b9-1						0.12196	6.91378					TRUE	FALSE	3-aminopyridine-like
xxxx_3.pdb	Fc1cc2c(CCNC(=O)C)c[nH]c2cc1	AAR-POS-d2a4d1df-2
xxxx_5.pdb	S(=O)(=O)(N)c1ccc(C(=O)OC)cc1	MAT-POS-7dfc56d9-1
xxxx_6.pdb	S(=O)(=O)(N)c1cc2N(C)CCCc2cc1	AAR-POS-d2a4d1df-4
xxxx_7.pdb	N#Cc1cnc(NCC)cc1	AAR-POS-d2a4d1df-5
xxxx_8.pdb	O=C(COc1ccc(C)cc1)N1CC[N+H](C)CC1	AAR-POS-d2a4d1df-6
xxxx_9.pdb	OC1CC[N+H](Cc2cscc2)CC1	AAR-POS-d2a4d1df-7
xxxx_10.pdb	F[C@H]1C[N+](Cc2sc(C)nn2)=CCC1	AAR-POS-d2a4d1df-8
xxxx_12.pdb	Fc1c(C(=O)NCCc2ccncc2)cccc1	AAR-POS-d2a4d1df-10
xxxx_14.pdb	O=C(NCCc1ccncc1)NC1CCCCC1	AAR-POS-d2a4d1df-12
xxxx_42.pdb	O=C(N)[C@@H]1[C@H](c2cscc2)CCC1	AAR-POS-d2a4d1df-14
xxxx_52.pdb	O=C(NCc1ccc(C#N)cc1)N1CCOCC1
3_mpro-x10876_0a_bound.pdb	O=C(N(Cc1cscc1)c1ccc(N(C)C)cc1)Cn1nnc2c1cccc2	ALP-POS-d2866bdf-1	O=C(N(Cc1cscc1)c1ccc(N(C)C)cc1)Cn1nnc2c1cccc2	ALP-POS-d2866bdf-1		90.2865	5.36883	84.4333	90.4552	1.79372	5.74624	0.92	0.48	99	197.798	FALSE	FALSE	3-aminopyridine-like	x10876
2_mpro-x10423_0a_bound.pdb	Clc1cc([C@H](C(=O)Nc2c(C)ccnc2)CCC)ccc1	JAN-GHE-83b26c96-8	Clc1cc(C(C(=O)Nc2c(C)ccnc2)CCC)ccc1	JAN-GHE-83b26c96-8		78.3182	5.47937	77.8527	90.6493	17.3103	4.76169	1	0.99	99	315.812	FALSE	FALSE	3-aminopyridine-like	x10423
4_mpro-x12177_0a_bound.pdb	Clc1cc(CN(C(=O)Cn2nnc3c2cccc3)c2ccc(OC)cc2)ccc1	CHO-MSK-00c5269a-2	Clc1cc(CN(C(=O)Cn2nnc3c2cccc3)c2ccc(OC)cc2)ccc1	CHO-MSK-00c5269a-2			5.65406			1.13776	5.94395					FALSE	FALSE	3-aminopyridine-like	x12177
4_mpro-x11543_0a_bound.pdb	Clc1cc(CC(=O)Nc2c(C3CC3)ccnc2)ccc1	ALP-POS-95b75b4d-5	Clc1cc(CC(=O)Nc2c(C3CC3)ccnc2)ccc1	ALP-POS-95b75b4d-5			7.39797			7.17364	5.14426				225.884	FALSE	FALSE	3-aminopyridine-like	x11543
3_mpro-x11317_0a_bound.pdb	Clc1cc(CC(=O)Nc2c(C)c(N)cnc2)ccc1	TRY-UNI-714a760b-3	Clc1cc(CC(=O)Nc2c(C)c(N)cnc2)ccc1	TRY-UNI-714a760b-3			8.2017			4.22234	5.37445				233.51	FALSE	FALSE	3-aminopyridine-like	x11317
3_mpro-x10871_0a_bound.pdb	O=C(N(Cc1cscc1)c1ccc(NC(=O)CC)cc1)Cn1nnc2c1cccc2	ALP-POS-c59291d4-2	O=C(N(Cc1cscc1)c1ccc(NC(=O)CC)cc1)Cn1nnc2c1cccc2	ALP-POS-c59291d4-2		78.1291	12.5623	79.6515	89.2902	1.62764	5.78844	0.95	0.9	99	195.716	FALSE	FALSE	3-aminopyridine-like	x10871
2_mpro-x2649_0a_bound.pdb	Clc1cc([C@H](C(=O)Nc2c(C)ccnc2)C)ccc1	TRY-UNI-714a760b-18	Clc1cc(C(C(=O)Nc2c(C)ccnc2)C)ccc1	TRY-UNI-714a760b-18	20.3783		12.9677	58.0202	78.7127	26.1796	4.58204	1	1	99		FALSE	FALSE	3-aminopyridine-like	x2649
2_mpro-x2646_0a_bound.pdb	Clc1cc(CC(=O)Nc2c(C)ccnc2)ccc1	TRY-UNI-714a760b-6	Clc1cc(CC(=O)Nc2c(C)ccnc2)ccc1	TRY-UNI-714a760b-6	20.0252		13.8952	61.6343	81.757	24.5666	4.60965	1	1	99		FALSE	FALSE	3-aminopyridine-like	x2646
4_mpro-x12143_0a_bound.pdb	O=C(N(Cc1ncsc1)c1ccc(N(C)C)cc1)Cn1nnc2c1cccc2	ALP-POS-87c86d55-1	O=C(N(Cc1ncsc1)c1ccc(N(C)C)cc1)Cn1nnc2c1cccc2	ALP-POS-87c86d55-1			14.297			4.85168	5.31411					FALSE	FALSE	3-aminopyridine-like	x12143
4_mpro-x11743_0a_bound.pdb	Clc1cc(NS(=O)(=O)N)cc(CC(=O)Nc2c(C)ccnc2)c1	WIL-MOD-03b86a88-6	Clc1cc(NS(=O)(=O)N)cc(CC(=O)Nc2c(C)ccnc2)c1	WIL-MOD-03b86a88-6		87.94	14.4718			11.2566	4.94859				214.689	FALSE	FALSE	3-aminopyridine-like	x11743
4_mpro-x11798_0a_bound.pdb	O=C(NC)Nc1ccc(N(C(=O)Cn2nnc3c2cccc3)Cc2cscc2)cc1	ROB-IMP-e811baff-1	O=C(NC)Nc1ccc(N(C(=O)Cn2nnc3c2cccc3)Cc2cscc2)cc1	ROB-IMP-e811baff-1			15.3273			1.42043	5.84758				148.953	FALSE	FALSE	3-aminopyridine-like	x11798
4_mpro-x11562_0a_bound.pdb	Clc1cc(CC(=O)Nc2c(C)ccnc2)c(OCCCC)cc1	EDG-MED-0da5ad92-7	Clc1cc(CC(=O)Nc2c(C)ccnc2)c(OCCCC)cc1	EDG-MED-0da5ad92-7			15.6858			24.7824	4.60586				225.643	FALSE	FALSE	3-aminopyridine-like	x11562
3_mpro-x11368_0a_bound.pdb	Brc1cc(CC(=O)Nc2c(C)ccnc2)ccc1	JAN-GHE-83b26c96-12	Brc1cc(CC(=O)Nc2c(C)ccnc2)ccc1	JAN-GHE-83b26c96-12		98.3386	15.943	56.1851	77.68	20.5939	4.68626	1.01	1		398.895	FALSE	FALSE	3-aminopyridine-like	x11368
3_mpro-x11488_0a_bound.pdb	Clc1cc([C@@H](C(=O)OC)C(=O)Nc2c(C)ccnc2)ccc1	MAT-POS-1e5f28a7-1	Clc1cc(C(C(=O)OC)C(=O)Nc2c(C)ccnc2)ccc1	MAT-POS-1e5f28a7-1			17.0914			23.7123	4.62503				146.848	FALSE	FALSE	3-aminopyridine-like	x11488
2_mpro-x10338_0a_bound.pdb	Clc1cc2[C@H](C(=O)Nc3c(CO)ccnc3)COc2cc1	JAG-UCB-a3ef7265-3	Clc1cc2[C@H](C(=O)Nc3c(CO)ccnc3)COc2cc1	JAG-UCB-a3ef7265-3		58.6223	18.388	46.1004	73.0506	42.3576	4.37307	1.01	1	99	0	FALSE	FALSE	3-aminopyridine-like
3_mpro-x10820_0a_bound.pdb	O=C(N(Cc1cscc1)c1ccc(NC)cc1)Cn1nnc2c1cccc2	ALP-POS-c59291d4-4	O=C(N(Cc1cscc1)c1ccc(NC)cc1)Cn1nnc2c1cccc2	ALP-POS-c59291d4-4		70.4922	18.6769	57.1234	82.6201	4.32893	5.36362	0.99	0.77	99	186.747	FALSE	FALSE	3-aminopyridine-like	x10820
4_mpro-x12321_0a_bound.pdb	Clc1cc(N[C@@H]2[C@H](C(F)(F)F)C2)cc(CC(=O)Nc2c(C)ccnc2)c1	MAT-POS-044491d2-3	Clc1cc(NC2C(C(F)(F)F)C2)cc(CC(=O)Nc2c(C)ccnc2)c1	MAT-POS-044491d2-3			19.7246			25.3164	4.5966					FALSE	FALSE	3-aminopyridine-like	x12321
3_mpro-x10679_0a_bound.pdb	Clc1cc2n(CC(=O)Nc3c(C)ccnc3)ccc2cc1	BAR-COM-0f94fc3d-41	Clc1cc2n(CC(=O)Nc3c(C)ccnc3)ccc2cc1	BAR-COM-0f94fc3d-41		77.42	19.9682	30.592	27.0131			0.99	0.98		295.917	FALSE	FALSE	3-aminopyridine-like	x10679
3_mpro-x11424_0a_bound.pdb	Clc1cc(CC(=O)Nc2c3c([nH]nc3)ccc2)ccc1	VLA-UCB-00f2c2b3-7	Clc1cc(CC(=O)Nc2c3c([nH]nc3)ccc2)ccc1	VLA-UCB-00f2c2b3-7			23.6029			99.5					250.138	FALSE	FALSE	3-aminopyridine-like	x11424
4_mpro-x11723_0a_bound.pdb	Clc1cc(OCc2onc(C)n2)cc(CC(=O)Nc2c(C)ccnc2)c1	CHO-MSK-6e55470f-5	Clc1cc(OCc2onc(C)n2)cc(CC(=O)Nc2c(C)ccnc2)c1	CHO-MSK-6e55470f-5			24.2584			23.9245	4.62116				347.755	FALSE	FALSE	3-aminopyridine-like	x11723
2_mpro-x10422_0a_bound.pdb	Clc1cc(C(C(=O)Nc2c(C)ccnc2)(C)C)ccc1	JAN-GHE-83b26c96-22	Clc1cc(C(C(=O)Nc2c(C)ccnc2)(C)C)ccc1	JAN-GHE-83b26c96-22		66.914	24.5228	49.3255	67.9542	96.9383	4.0135	1	1	99	268.056	FALSE	FALSE	3-aminopyridine-like	x10422
3_mpro-x11011_0a_bound.pdb	Clc1cc(NC(=O)Cc2c(C)ccnc2)ccc1	EDJ-MED-49816e9b-1	Clc1cc(NC(=O)Cc2c(C)ccnc2)ccc1	EDJ-MED-49816e9b-1		88.6064	26.3621	42.1931	67.3871	29.8596	4.52492	1	1	99	166.77	FALSE	FALSE	3-aminopyridine-like	x11011
3_mpro-x10870_0a_bound.pdb	O=C(N(Cc1cscc1)c1ccc(NC(=O)C2CC2)cc1)Cn1nnc2c1cccc2	ALP-POS-c59291d4-3	O=C(N(Cc1cscc1)c1ccc(NC(=O)C2CC2)cc1)Cn1nnc2c1cccc2	ALP-POS-c59291d4-3		62.2356	28.3533	68.9746	70.1959	3.99496	5.39849	0.9	0.59	99	311.549	FALSE	FALSE	3-aminopyridine-like	x10870
4_mpro-x11789_0a_bound.pdb	Clc1cc(CC(=O)Nn2nnc3c2cccc3)ccc1	MAT-POS-bfb445d4-2	Clc1cc(CC(=O)Nn2nnc3c2cccc3)ccc1	MAT-POS-bfb445d4-2			31.043			5.80242	5.23639				178.511	FALSE	FALSE	3-aminopyridine-like	x11789
4_mpro-x11757_0a_bound.pdb	O=C(N(Cc1ncccc1)c1ccc(C2CC[N+H2]CC2)cc1)Cn1nnc2c1cc(OC)cc2	ALP-POS-c0c213c9-1	O=C(N(Cc1ncccc1)c1ccc(C2CCNCC2)cc1)Cn1nnc2c1cc(OC)cc2	ALP-POS-c0c213c9-1		94.805	32.1898			38.7739	4.41146				101.753	FALSE	FALSE	3-aminopyridine-like	x11757
3_mpro-x11318_0a_bound.pdb	O=C(Nc1c(C)c(N)cnc1)Cc1cc(C#N)ccc1	TRY-UNI-714a760b-19	O=C(Nc1c(C)c(N)cnc1)Cc1cc(C#N)ccc1	TRY-UNI-714a760b-19			32.2211			16.0656	4.7941				217.296	FALSE	FALSE	3-aminopyridine-like	x11318
4_mpro-x12300_0a_bound.pdb	Clc1cc(NCC(C#N)(C)C)cc(CC(=O)Nc2c(C)ccnc2)c1	MAT-POS-044491d2-7	Clc1cc(NCC(C#N)(C)C)cc(CC(=O)Nc2c(C)ccnc2)c1	MAT-POS-044491d2-7			32.878			36.5317	4.43733					FALSE	FALSE	3-aminopyridine-like	x12300
4_mpro-x11764_0a_bound.pdb	Clc1cc(N[C@@H]2[C@@H](O)CCC2)cc(CC(=O)Nc2c(C)ccnc2)c1	MAT-POS-044491d2-1	Clc1cc(NC2C(O)CCC2)cc(CC(=O)Nc2c(C)ccnc2)c1	MAT-POS-044491d2-1		61.545	38.8559			19.7025	4.70548				190.45	FALSE	FALSE	3-aminopyridine-like	x11764
3_mpro-x10638_0a_bound.pdb	Clc1cc2N(CC(=O)Nc3c(C)ccnc3)C(=O)COc2cc1	BAR-COM-0f94fc3d-48	Clc1cc2N(CC(=O)Nc3c(C)ccnc3)C(=O)COc2cc1	BAR-COM-0f94fc3d-48		67.195	38.9273	32.7613	49.2749	59.9331	4.22233	0.99	0.99	99	247.086	FALSE	FALSE	Ugi	x10638
3_mpro-x11271_0a_bound.pdb	Clc1cc(OC)cc(CC(=O)Nc2c(C)ccnc2)c1	MAT-POS-c9973a83-1	Clc1cc(OC)cc(CC(=O)Nc2c(C)ccnc2)c1	MAT-POS-c9973a83-1			43.6028	24.6173	48.2987	36.7823	4.43436				240.43	FALSE	FALSE	3-aminopyridine-like	x11271
2_mpro-x2572_0a_bound.pdb	O=C(Nc1c(C)ccnc1)Cc1cc(C#N)ccc1	TRY-UNI-714a760b-20	O=C(Nc1c(C)ccnc1)Cc1cc(C#N)ccc1	TRY-UNI-714a760b-20	20.495	52.68	43.8471	33.5616	58.3188	61.3303	4.21233	1	1.01	99		FALSE	FALSE	3-aminopyridine-like	x2572
2_mpro-x2912_0a_bound.pdb	O=C(Nc1c(C)ccnc1)[C@H](C)c1cc(C#N)ccc1	TRY-UNI-714a760b-22	O=C(Nc1c(C)ccnc1)C(C)c1cc(C#N)ccc1	TRY-UNI-714a760b-22	21.0225	58.415	45.3119	35.4089	61.4112	54.9421	4.26009	1	1	99		FALSE	FALSE	3-aminopyridine-like	x2912
2_mpro-x2908_0a_bound.pdb	Clc1cc(NC(=O)Nc2c(C)ccnc2)ccc1	TRY-UNI-714a760b-12	Clc1cc(NC(=O)Nc2c(C)ccnc2)ccc1	TRY-UNI-714a760b-12	25.5825	64.135	45.6893	32.145	58.7087	64.4136	4.19102	0.99	0.96	99		FALSE	FALSE	3-aminopyridine-like	x2908
4_mpro-x11557_0a_bound.pdb	Clc1cc([C@H](C(=O)Nc2c(C)ccnc2)CO)ccc1	EDG-MED-0da5ad92-5	Clc1cc(C(C(=O)Nc2c(C)ccnc2)CO)ccc1	EDG-MED-0da5ad92-5			47.3187			99.5					163.681	FALSE	FALSE	3-aminopyridine-like	x11557
4_mpro-x11801_0a_bound.pdb	Clc1cc(CNC(=O)C)cc(CC(=O)Nc2c(C)ccnc2)c1	RAL-THA-6b94ceba-5	Clc1cc(CNC(=O)C)cc(CC(=O)Nc2c(C)ccnc2)c1	RAL-THA-6b94ceba-5			55.521			41.33	4.38373				195.371	FALSE	FALSE	3-aminopyridine-like	x11801
3_mpro-x10535_0a_bound.pdb	Clc1cc(N2C(=O)[C@@H](c3cnccc3)NC2=O)ccc1	JAN-GHE-83b26c96-18	Clc1cc(N2C(=O)C(c3cnccc3)NC2=O)ccc1	JAN-GHE-83b26c96-18		69.5562	57.8484	18.1072	33.9251			0.85	0.91		0	FALSE	FALSE	3-aminopyridine-like
3_mpro-x10942_0a_bound.pdb	Clc1cc2[C@H](C(=O)Nc3c(CO)ccnc3)CCOc2cc1	LON-WEI-0a73fcb8-7	Clc1cc2C(C(=O)Nc3c(CO)ccnc3)CCOc2cc1	LON-WEI-0a73fcb8-7		58.9304	66.3508	64.5465	84.2291	13.672	4.86417	0.94	0.93	99	112.764	FALSE	FALSE	3-aminopyridine-like	x10942
3_mpro-x10565_0a_bound.pdb	Ic1cc(CC(=O)Nc2c(C)ccnc2)ccc1	JAN-GHE-83b26c96-13	Ic1cc(CC(=O)Nc2c(C)ccnc2)ccc1	JAN-GHE-83b26c96-13		64.3245	69.0919	17.4127	39.6739			1	1		369.301	FALSE	FALSE	3-aminopyridine-like	x10565
4_mpro-x11641_0a_bound.pdb	Clc1cc(O[C@H]2NC(=O)C2)cc([C@@H](C(=O)Nc2c(C)ccnc2)C)c1	TRY-UNI-2eddb1ff-8	Clc1cc(OC2NC(=O)C2)cc(C(C(=O)Nc2c(C)ccnc2)C)c1	TRY-UNI-2eddb1ff-8			88.0923			77.1348	4.11275					FALSE	FALSE	3-aminopyridine-like	x11641
4_mpro-x11797_0a_bound.pdb	O=C(N(Cc1n[nH]cc1)c1ccc(N(C)C)cc1)Cn1nnc2c1cccc2	PET-UNK-7374c256-2	O=C(N(Cc1[nH]ncc1)c1ccc(N(C)C)cc1)Cn1nnc2c1cccc2	PET-UNK-7374c256-2			90.7576			15.9361	4.79762				97.8481	FALSE	FALSE	3-aminopyridine-like	x11797
2_mpro-x10201_0a_bound.pdb	Clc1cc(CC(=O)Nc2cnccc2)ccc1	EDG-MED-0da5ad92-2	Clc1cc(CC(=O)Nc2cnccc2)ccc1	EDG-MED-0da5ad92-2		52.3683	99	24.075	40.8905	53.7173	4.26989			99	309.415	FALSE	FALSE	3-aminopyridine-like	x10201
2_mpro-x10237_0a_bound.pdb	Clc1cc(N(C(=O)Nc2cnccc2)CC[N+H]2CCOCC2)ccc1	JOR-UNI-2fc98d0b-6	Clc1cc(N(C(=O)Nc2cnccc2)CCN2CCOCC2)ccc1	JOR-UNI-2fc98d0b-6		59.3594	99	24.3505	49.6179						220.109	FALSE	FALSE	3-aminopyridine-like	x10237
2_mpro-x10324_0a_bound.pdb	Clc1cc2[C@H](C(=O)Nc3n(C4CC4)cnn3)CCOc2cc1	JAG-UCB-a3ef7265-20	Clc1cc2C(C(=O)Nc3n(C4CC4)cnn3)CCOc2cc1	JAG-UCB-a3ef7265-20		1.89939	99	46.6946	54.6478	0.597853	6.22341	1	1		145.759	FALSE	FALSE	3-aminopyridine-like	x10324
3_mpro-x11025_0a_bound.pdb	Clc1cc(CC(=O)Nc2c(C)n[nH]c2)ccc1	EDG-MED-0da5ad92-21	Clc1cc(CC(=O)Nc2c(C)[nH]nc2)ccc1	EDG-MED-0da5ad92-21		52.1292	99	3.64058	6.92537			0.99	1		57.196	FALSE	FALSE	3-aminopyridine-like	x11025
3_mpro-x11159_0a_bound.pdb	O=C(Nc1n(C2CC2)cnn1)[C@H]1c2c(OCC1)cccc2	EDJ-MED-0e996074-1	O=C(Nc1n(C2CC2)cnn1)C1c2c(OCC1)cccc2	EDJ-MED-0e996074-1			99	-1.26866	2.15274						0	FALSE	FALSE	3-aminopyridine-like	x11159
3_mpro-x11164_0a_bound.pdb	O=C(N(Cc1nn(C)cc1)c1ccc(-c2ncccc2)cc1)Cc1cnccc1	ALP-POS-c0c213c9-14	O=C(N(Cc1nn(C)cc1)c1ccc(-c2ncccc2)cc1)Cc1cnccc1	ALP-POS-c0c213c9-14			99	6.61524	16.0972						121.293	FALSE	FALSE	3-aminopyridine-like	x11164
3_mpro-x11354_0a_bound.pdb	O=C(Nc1c2c(ccc1)CC[N+H2]C2)Cc1c(C)ccnc1	ADA-UCB-6c2cb422-3	O=C(Nc1c2c(ccc1)CCNC2)Cc1c(C)ccnc1	ADA-UCB-6c2cb422-3			99	-1.08081	2.76347						78.6841	FALSE	FALSE	3-aminopyridine-like	x11354
3_mpro-x11417_0a_bound.pdb	O=C(Nc1c(C)ccnc1)C[N+H]1CCN(C(=O)C)CC1	BEN-DND-93268d01-8	O=C(Nc1c(C)ccnc1)CN1CCN(C(=O)C)CC1	BEN-DND-93268d01-8			99			0.637898	6.19525				0	FALSE	FALSE	3-aminopyridine-like	x11417
3_mpro-x11428_0a_bound.pdb	O=C(Nc1c(C)ccnc1)C[N+H]1CCCCC1	BEN-DND-93268d01-11	O=C(Nc1c(C)ccnc1)CN1CCCCC1	BEN-DND-93268d01-11			99			99.5					62.316	FALSE	FALSE	3-aminopyridine-like	x11428
3_mpro-x11432_0a_bound.pdb	Clc1cc(CN(C(=O)Cn2nnc3c2cccc3)C)ccc1	EDJ-MED-06d94977-2	Clc1cc(CN(C(=O)Cn2nnc3c2cccc3)C)ccc1	EDJ-MED-06d94977-2			99			99.5					149.194	FALSE	FALSE		x11432
3_mpro-x11473_0a_bound.pdb	Clc1cc(CC(=O)Nc2n(C)cnc2)ccc1	PET-UNK-8df914d1-4	Clc1cc(CC(=O)Nc2n(C)cnc2)ccc1	PET-UNK-8df914d1-4			99			93.8839	4.02741				161.958	FALSE	FALSE	3-aminopyridine-like	x11473
3_mpro-x11485_0a_bound.pdb	Clc1cc(CC(=O)Nc2c(C)ccnn2)ccc1	EDG-MED-0da5ad92-15	Clc1cc(CC(=O)Nc2c(C)ccnn2)ccc1	EDG-MED-0da5ad92-15			99			99.5					168.217	FALSE	FALSE	3-aminopyridine-like	x11485
3_mpro-x11493_0a_bound.pdb	Clc1cc(CC(=O)Nc2ncn3c2C=CC=C3)ccc1	EDJ-MED-50fe53e8-3	Clc1cc(CC(=O)Nc2ncn3c2C=CC=C3)ccc1	EDJ-MED-50fe53e8-3			99			99.5					215.345	FALSE	FALSE	3-aminopyridine-like	x11493
3_mpro-x11513_0a_bound.pdb	Clc1cc(CCC(=O)Nc2c(C)ccnc2)ccc1	ALP-POS-f13221e1-4	Clc1cc(CCC(=O)Nc2c(C)ccnc2)ccc1	ALP-POS-f13221e1-4			99			99.5					152.228	FALSE	FALSE		x11513
4_mpro-x11532_0a_bound.pdb	Clc1cc(CC(=O)Nc2c[nH]nc2)ccc1	MIC-UNK-66895286-1	Clc1cc(CC(=O)Nc2c[nH]nc2)ccc1	MIC-UNK-66895286-1			99			99.5					54.1127	FALSE	FALSE	3-aminopyridine-like	x11532
4_mpro-x11540_0a_bound.pdb	Clc1cc(NC(=O)Cc2c(C)n[nH]c2)ccc1	MIC-UNK-66895286-3	Clc1cc(NC(=O)Cc2c(C)[nH]nc2)ccc1	MIC-UNK-66895286-3			99			54.6064	4.26276				133.124	FALSE	FALSE	3-aminopyridine-like	x11540
4_mpro-x11560_0a_bound.pdb	FC(F)O[C@H](C(=O)Nc1c(C)ccnc1)C	MAT-POS-590ac91e-17	O=C(Nc1c(C)ccnc1)CCc1[nH]ncc1	MAT-POS-590ac91e-17		-1.76189	99	18.9394	-26.3188			1	1		0	FALSE	FALSE
4_mpro-x12136_0a_bound.pdb	Clc1cc2[C@H](C(=O)NC3=C(C)C=Cn4c3nnc4)CCOc2cc1	JAG-UCB-52b62a6f-11	Clc1cc2C(C(=O)NC3=C(C)C=Cn4c3nnc4)CCOc2cc1	JAG-UCB-52b62a6f-11			99			99.5						FALSE	FALSE	3-aminopyridine-like	x12136
4_mpro-x12682_0a_bound.pdb	Clc1cc2[C@H](C(=O)N[C@H]3CC(=O)NCC3)CCOc2cc1	ALP-POS-8b8a49e1-4	Clc1cc2C(C(=O)NC3CC(=O)NCC3)CCOc2cc1	ALP-POS-8b8a49e1-4			99									FALSE	FALSE	3-aminopyridine-like
2_mpro-x2562_0a_bound.pdb	O=C(Nc1cc(O[C@H]2NC(=O)C2)ccc1)Cc1cncnc1	BAR-COM-4e090d3a-39	O=C(Nc1cc(OC2NC(=O)C2)ccc1)Cc1cncnc1	BAR-COM-4e090d3a-39	-2.075	8.105		7.8633	22.7737			1	1			FALSE	FALSE	3-aminopyridine-like	x2562
2_mpro-x2569_0a_bound.pdb	O=C(Nc1cnccc1)Cc1cc(C#N)cnc1	DAR-DIA-23aa0b97-17	O=C(Nc1cnccc1)Cc1cc(C#N)cnc1	DAR-DIA-23aa0b97-17	6.5775	12.695		6.6104	21.8058			1	1			FALSE	FALSE	3-aminopyridine-like	x2569
2_mpro-x2581_0a_bound.pdb	O=C(Nc1nccc(OC)c1)Cc1cc2c(cc1)cccc2	ALV-UNI-7ff1a6f9-47	O=C(Nc1nccc(OC)c1)Cc1cc2c(cc1)cccc2	ALV-UNI-7ff1a6f9-47	0	17.05		3.47124	6.0933			0.95	0.91			FALSE	FALSE	3-aminopyridine-like	x2581
2_mpro-x2600_0a_bound.pdb	O=C(Nc1cnccc1)Cc1cc(C#N)ccc1	ANN-UNI-26382800-5	O=C(Nc1cnccc1)Cc1cc(C#N)ccc1	ANN-UNI-26382800-5	0	11.54		11.4041	24.961			1	1			FALSE	FALSE	3-aminopyridine-like	x2600
2_mpro-x2608_0a_bound.pdb	O=C(Nc1sc(C)cc1)Nc1cnccc1	DAR-DIA-842b4336-3	O=C(Nc1sc(C)cc1)Nc1cnccc1	DAR-DIA-842b4336-3	2.6175	28.585		1.90184	11.3201			1	0.96			FALSE	FALSE	3-aminopyridine-like	x2608
2_mpro-x2643_0a_bound.pdb	Clc1sc(CC(=O)Nc2cnccc2)cc1	DAR-DIA-842b4336-13	Clc1sc(CC(=O)Nc2cnccc2)cc1	DAR-DIA-842b4336-13	0			0.922022	11.5004			1	1			FALSE	FALSE	3-aminopyridine-like	x2643
2_mpro-x3305_0a_bound.pdb	O=C(N(CCc1ccccc1)Cc1cnccc1)NCc1nnn(C)c1	BAR-COM-4e090d3a-47	O=C(N(CCc1ccccc1)Cc1cnccc1)NCc1nnn(C)c1	BAR-COM-4e090d3a-47	0	0			8.12364			1	1			FALSE	FALSE		x3305
2_mpro-x10247_0a_bound.pdb	FC(F)(F)c1cc(CC(=O)Nc2c(C)ccnc2)ccc1	JAN-GHE-83b26c96-14	FC(F)(F)c1cc(CC(=O)Nc2c(C)ccnc2)ccc1	JAN-GHE-83b26c96-14		49.3151		23.9885	49.125						176.729	FALSE	FALSE	3-aminopyridine-like	x10247
2_mpro-x10248_0a_bound.pdb	O=C(Nc1c(C)ccnc1)Cc1ccc(C)cc1	JAN-GHE-83b26c96-11	O=C(Nc1c(C)ccnc1)Cc1ccc(C)cc1	JAN-GHE-83b26c96-11		5.56069		6.31988	3.26725						246.634	FALSE	FALSE	3-aminopyridine-like	x10248
2_mpro-x10296_0a_bound.pdb	Fc1ccc(C[N+]2=CCN(C(=O)CC)CC2)cc1	ANT-OPE-d972fbad-1	Fc1ccc(CN2CCN(C(=O)C=C)CC2)cc1	ANT-OPE-d972fbad-1		0		7.92416	11.4243							TRUE	FALSE
2_mpro-x10314_0a_bound.pdb	O=C(Nc1c(C)ccnc1)Cc1cc(C#N)cnc1	TRY-UNI-2eddb1ff-1	O=C(Nc1c(C)ccnc1)Cc1cc(C#N)cnc1	TRY-UNI-2eddb1ff-1		22.8678		35.5163	42.149			1.01	1		234.222	FALSE	FALSE	3-aminopyridine-like	x10314
2_mpro-x10322_0a_bound.pdb	O=C(Nc1cc(O[C@@H]2NC(=O)C2)cc(C)c1)Cc1cncnc1	RAL-MED-2de63afb-2	O=C(Nc1cc(OC2NC(=O)C2)cc(C)c1)Cc1cncnc1	RAL-MED-2de63afb-2		44.9512		49.3071	72.7227	34.3199	4.46445	1.01	1		443.664	FALSE	FALSE	3-aminopyridine-like	x10322
2_mpro-x10327_0a_bound.pdb	Clc1cc([C@H](C(=O)Nc2c(C)ccnc2)C(C)C)ccc1	JAN-GHE-83b26c96-9	Clc1cc(C(C(=O)Nc2c(C)ccnc2)C(C)C)ccc1	JAN-GHE-83b26c96-9		15.0034		21.3389	42.4666			0.99	0.99		133.931	FALSE	FALSE	3-aminopyridine-like	x10327
2_mpro-x10329_0a_bound.pdb	Clc1cc([C@@H](C(=O)Nc2c(C)cnnc2)CC)ccc1	JAN-GHE-83b26c96-1	Clc1cc(C(C(=O)Nc2c(C)cnnc2)CC)ccc1	JAN-GHE-83b26c96-1		0		2.53557	1.14597			0.99	1		76.5381	FALSE	FALSE	3-aminopyridine-like	x10329
2_mpro-x10334_0a_bound.pdb	Clc1cc(CC(=O)Nc2c(C)nccc2C)ccc1	EDJ-MED-49816e9b-2	Clc1cc(CC(=O)Nc2c(C)nccc2C)ccc1	EDJ-MED-49816e9b-2		8.49701		-1.59833	13.2529			1	1		210.293	FALSE	FALSE	3-aminopyridine-like	x10334
2_mpro-x10359_0a_bound.pdb	O=C(Nc1c(C)ccnc1)Cc1cc(O)ccc1	ALP-POS-95b75b4d-2	O=C(Nc1c(C)ccnc1)Cc1cc(O)ccc1	ALP-POS-95b75b4d-2		1.0436		-7.01925	6.45991			1	1		292.228	FALSE	FALSE	3-aminopyridine-like	x10359
2_mpro-x10371_0a_bound.pdb	O=C(Nc1cc(O[C@@H]2NC(=O)C2)ccc1)Cc1cnccc1	RAL-MED-2de63afb-1	O=C(Nc1cc(OC2NC(=O)C2)ccc1)Cc1cnccc1	RAL-MED-2de63afb-1		26.4402		39.5682	71.7735	88.3423	4.05383	0.97	0.99			FALSE	FALSE	3-aminopyridine-like	x10371
2_mpro-x10377_0a_bound.pdb	Clc1cc([C@H](C(=O)Nc2c(-n3nccc3)ccnc2)C)ccc1	JAN-GHE-83b26c96-3	Clc1cc(C(C(=O)Nc2c(-n3nccc3)ccnc2)C)ccc1	JAN-GHE-83b26c96-3		4.02603		11.2887	38.8682			1.01	1		94.1046	FALSE	FALSE	3-aminopyridine-like	x10377
2_mpro-x10392_0a_bound.pdb	Clc1cc(C2(C(=O)Nc3c(C)ccnc3)CC2)ccc1	JAN-GHE-83b26c96-20	Clc1cc(C2(C(=O)Nc3c(C)ccnc3)CC2)ccc1	JAN-GHE-83b26c96-20		43.3033		38.4117	61.6185	99.5		1.01	1	99	297.847	FALSE	FALSE	3-aminopyridine-like	x10392
2_mpro-x10395_0a_bound.pdb	Clc1cc([C@H]([N+H](C)C)C(=O)Nc2c(C)ccnc2)ccc1	JAN-GHE-83b26c96-10	Clc1cc(C(N(C)C)C(=O)Nc2c(C)ccnc2)ccc1	JAN-GHE-83b26c96-10		16.7607		16.2176	38.989			1	1		0	FALSE	FALSE	3-aminopyridine-like	x10395
2_mpro-x10417_0a_bound.pdb	Fc1cc(CC(=O)Nc2c(C)ccnc2)ccc1	ALP-POS-95b75b4d-1	Fc1cc(CC(=O)Nc2c(C)ccnc2)ccc1	ALP-POS-95b75b4d-1		40.8545		39.6352	65.2515	95.8331	4.01848	1.01	1	99	345.409	FALSE	FALSE	3-aminopyridine-like	x10417
2_mpro-x10421_0a_bound.pdb	O=C(Nc1cnccc1)[C@@H](CC[N+H2]C)c1ccccc1	ADA-UNI-f8e79267-5	O=C(Nc1cnccc1)C(CCNC)c1ccccc1	ADA-UNI-f8e79267-5		2.1941		-5.69205	1.54637			1	1		172.628	FALSE	FALSE	3-aminopyridine-like	x10421
2_mpro-x10473_0a_bound.pdb	O=C(Nc1c(C)ccnc1)[C@@H](CC1CC1)C	MAT-POS-590ac91e-5	O=C(Nc1c(C)ccnc1)C(CC1CC1)C	MAT-POS-590ac91e-5		0		-2.36531	2.12211			1	1		0	FALSE	FALSE		x10473
2_mpro-x10474_0a_bound.pdb	O=C(Nc1c(C)ccnc1)C[C@@H](C(C)C)C	MAT-POS-590ac91e-11	O=C(Nc1c(C)ccnc1)CC(C(C)C)C	MAT-POS-590ac91e-11		6.99419		-5.57786	29.1808	99.03		1	1	99	142.634	FALSE	FALSE		x10474
2_mpro-x10476_0a_bound.pdb	O=C(Nc1c(C)ccnc1)[C@H]1CC2(CC1)CC2	MAT-POS-590ac91e-21	O=C(Nc1c(C)ccnc1)C1CC2(CC2)CC1	MAT-POS-590ac91e-21		18.8253		4.52784	5.74589			1	1		229.027	FALSE	FALSE		x10476
2_mpro-x10478_0a_bound.pdb	O=C(Nc1c(C)ccnc1)C[C@@]12[C@@H](C1)CCC2	MAT-POS-590ac91e-25	O=C(Nc1c(C)ccnc1)CC12C(C1)CCC2	MAT-POS-590ac91e-25		0		1.03751	23.5682			0.98	0.99		94.2465	FALSE	FALSE		x10478
2_mpro-x10484_0a_bound.pdb	O=C(Nc1c(C)ccnc1)CC(C)(C)c1ccccc1	BEN-DND-93268d01-13	O=C(Nc1c(C)ccnc1)CC(C)(C)c1ccccc1	BEN-DND-93268d01-13		11.4541		3.57783	12.2197			1	1		230.497	FALSE	FALSE		x10484
2_mpro-x10488_0a_bound.pdb	O=C(Cc1cnccc1)N1[C@H](c2nc(C3CC3)on2)CCC1	JAG-UCB-cedd89ab-4	O=C(Cc1cnccc1)N1[C@H](c2nc(C3CC3)on2)CCC1	JAG-UCB-cedd89ab-4		0		5.82786	19.9186			1	1			FALSE	FALSE
2_mpro-x10494_0a_bound.pdb	Clc1cc(CC(=O)Nc2c(N)nccc2C)ccc1	EDG-MED-0da5ad92-18	Clc1cc(CC(=O)Nc2c(N)nccc2C)ccc1	EDG-MED-0da5ad92-18		0		6.43759	20.0662			1	0.99		384.02	FALSE	FALSE	3-aminopyridine-like	x10494
3_mpro-x10555_0a_bound.pdb	O=C(Nc1c(C)ccnc1)[C@@H]1C2(CC1)CCC2	MAT-POS-590ac91e-22	O=C(Nc1c(C)ccnc1)C1C2(CC1)CCC2	MAT-POS-590ac91e-22		4.13663		-3.56672	3.78856			1	1		0	FALSE	FALSE		x10555
3_mpro-x10559_0a_bound.pdb	O=C(Nc1c(C)ccnc1)C1CC(C2CC2)C1	MAT-POS-590ac91e-18	O=C(Nc1c(C)ccnc1)C1CC(C2CC2)C1	MAT-POS-590ac91e-18		45.2875		17.6169	35.209			1	1		243.438	FALSE	FALSE		x10559
3_mpro-x10575_0a_bound.pdb	O=C(Nc1c(C)ccnc1)CC1C[C@H]2[C@@H](C1)C2	MAT-POS-590ac91e-23	O=C(Nc1c(C)ccnc1)CC1CC2C(C1)C2	MAT-POS-590ac91e-23		0		11.5127	12.287			1	1		122.087	FALSE	FALSE	3-aminopyridine-like	x10575
3_mpro-x10604_0a_bound.pdb	Clc1cc(CC(=O)NN2C(=O)NN=C2)ccc1	JAN-GHE-5a013bed-4	Clc1cc(CC(=O)NN2C(=O)NN=C2)ccc1	JAN-GHE-5a013bed-4		7.935		0.405142	0.786645			1	1.01		130.962	FALSE	FALSE	3-aminopyridine-like	x10604
3_mpro-x10606_0a_bound.pdb	Clc1cc(S(=O)(=O)Nc2c(C)ccnc2)ccc1	JAN-GHE-83b26c96-21	Clc1cc(S(=O)(=O)Nc2c(C)ccnc2)ccc1	JAN-GHE-83b26c96-21		15.16		1.91658	3.052			1	1		139.584	FALSE	FALSE		x10606
3_mpro-x10610_0a_bound.pdb	O=C(Nc1c(C)ccnc1)[C@]1(C#N)COCC1	MAT-POS-590ac91e-27	O=C(Nc1c(C)ccnc1)C1(C#N)COCC1	MAT-POS-590ac91e-27		4.01		-7.72163	-6.21209			1	1		0	FALSE	FALSE		x10610
3_mpro-x10626_0a_bound.pdb	O=C(Nc1c(C)ccnc1)C1[C@H]2[C@@H]1CCCC2	MAT-POS-590ac91e-19	O=C(Nc1c(C)ccnc1)C1[C@H]2[C@@H]1CCCC2	MAT-POS-590ac91e-19		0		3.01839	-3.51288			1	1		292.798	FALSE	FALSE		x10626
3_mpro-x10645_0a_bound.pdb	Fc1cc2[C@H](C(=O)Nc3c(NC(=O)C)ccnc3)Cc2cc1	BAR-COM-0f94fc3d-59	Fc1cc2C(C(=O)Nc3c(NC(=O)C)ccnc3)Cc2cc1	BAR-COM-0f94fc3d-59		0		-2.43534	-1.01483			1	1		142.912	FALSE	FALSE	3-aminopyridine-like	x10645
3_mpro-x10733_0a_bound.pdb	Fc1cc2n(CC(=O)Nc3c(C)ccnc3)ccc2cc1	BAR-COM-0f94fc3d-18	Fc1cc2n(CC(=O)Nc3c(C)ccnc3)ccc2cc1	BAR-COM-0f94fc3d-18		41.685		31.4726	7.81691			1	1		0	FALSE	FALSE	3-aminopyridine-like	x10733
3_mpro-x10756_0a_bound.pdb	O=C(Nc1c(C)ccnc1)Cc1cc(O[C@H]2NC(=O)C2)ccc1	BRU-LEF-c49414a7-1	O=C(Nc1c(C)ccnc1)Cc1cc(OC2NC(=O)C2)ccc1	BRU-LEF-c49414a7-1		0		5.50157	16.6562			1.01	1.01		309.171	FALSE	FALSE	3-aminopyridine-like	x10756
3_mpro-x10787_0a_bound.pdb	Clc1cc(C2(C(=O)Nc3c(C)ccnc3)CC(=O)C2)ccc1	BAR-COM-0f94fc3d-25	Clc1cc(C2(C(=O)Nc3c(C)ccnc3)CC(=O)C2)ccc1	BAR-COM-0f94fc3d-25		27.025		9.68306	22.6025			0.99	0.97		287.759	FALSE	FALSE	3-aminopyridine-like	x10787
3_mpro-x10800_0a_bound.pdb	O=C(Nc1cnccc1)NC1(Cc2ccccc2)CCOCC1	NAU-LAT-445f63e5-6	O=C(Nc1cnccc1)NC1(Cc2ccccc2)CCOCC1	NAU-LAT-445f63e5-6		14.6038		6.39767	-1.32463			0.98	0.99		83.5772	FALSE	FALSE	3-aminopyridine-like	x10800
3_mpro-x10801_0a_bound.pdb	O=C(Nc1c(C)ccnc1)CC1CC2(C1)CC2	MAT-POS-590ac91e-24	O=C(Nc1c(C)ccnc1)CC1CC2(C1)CC2	MAT-POS-590ac91e-24		2.50792		-10.3199	14.4864			1	1		196.604	FALSE	FALSE	3-aminopyridine-like	x10801
3_mpro-x10834_0a_bound.pdb	Brc1cc([C@H](O)C(=O)Nc2c(OC)ccnc2)ccc1	BAR-COM-0f94fc3d-23	Brc1cc(C(O)C(=O)Nc2c(OC)ccnc2)ccc1	BAR-COM-0f94fc3d-23		12.1203		-3.62629	-3.69674			1	0.99		205.394	FALSE	FALSE	3-aminopyridine-like	x10834
3_mpro-x10862_0a_bound.pdb	Brc1cc([C@@H](NC(=O)C[C@@H]2C(=O)Nc3c2cc(F)cc3)COC)ccc1	BAR-COM-0f94fc3d-3	Brc1cc(C(NC(=O)CC2C(=O)Nc3c2cc(F)cc3)COC)ccc1	BAR-COM-0f94fc3d-3		-20.9367		6.36948	21.5933			1	0.97		0	FALSE	FALSE		x10862
3_mpro-x10888_0a_bound.pdb	Clc1cc([C@](O)(C(=O)Nc2c(C)ccnc2)CC)ccc1	BAR-COM-0f94fc3d-38	Clc1cc(C(O)(C(=O)Nc2c(C)ccnc2)CC)ccc1	BAR-COM-0f94fc3d-38		7.88646		11.5741	14.9514			0.99	1		172.629	FALSE	FALSE	3-aminopyridine-like	x10888
3_mpro-x10889_0a_bound.pdb	S(=O)(=O)(NCC[C@@H](C(=O)Nc1cnccc1)c1ccccc1)C	ADA-UNI-f8e79267-2	S(=O)(=O)(NCCC(C(=O)Nc1cnccc1)c1ccccc1)C	ADA-UNI-f8e79267-2		-18.5725		-16.9994	-3.17535			0.98	0.99		118.233	FALSE	FALSE	3-aminopyridine-like	x10889
3_mpro-x10900_0a_bound.pdb	Clc1cc([C@H](C(=O)Nc2c(C)ccnc2)C)cnc1	TRY-UNI-2eddb1ff-3	Clc1cc(C(C(=O)Nc2c(C)ccnc2)C)cnc1	TRY-UNI-2eddb1ff-3		15.0796		-18.8501	-5.64141			0.98	0.95		172.237	FALSE	FALSE	3-aminopyridine-like	x10900
3_mpro-x10976_0a_bound.pdb	Clc1cc(CC(=O)Nc2cc(C)cnc2)ccc1	EDG-MED-0da5ad92-12	Clc1cc(CC(=O)Nc2cc(C)cnc2)ccc1	EDG-MED-0da5ad92-12		38.6323		19.8409	42.6692			1	1			FALSE	FALSE	3-aminopyridine-like	x10976
3_mpro-x10996_0a_bound.pdb	Clc1cc(NC(=O)Nc2cnccc2)ccc1	DAR-DIA-23aa0b97-14	Clc1cc(NC(=O)Nc2cnccc2)ccc1	DAR-DIA-23aa0b97-14		44.0598		12.8579	30.9217			0.98	0.99		175.95	FALSE	FALSE	3-aminopyridine-like	x10996
3_mpro-x11013_0a_bound.pdb	Clc1cc(CC(=O)Nc2c(C)cnnc2)ccc1	EDG-MED-0da5ad92-16	Clc1cc(CC(=O)Nc2c(C)cnnc2)ccc1	EDG-MED-0da5ad92-16		13.8287		-3.56281	-2.64769			0.99	1		90.2782	FALSE	FALSE	3-aminopyridine-like	x11013
3_mpro-x11041_0a_bound.pdb	Clc1cc(CC(=O)N(C)c2c(C)ccnc2)ccc1	JAN-GHE-83b26c96-15	Clc1cc(CC(=O)N(C)c2c(C)ccnc2)ccc1	JAN-GHE-83b26c96-15		0		5.97366	15.1001			1	1		0	FALSE	FALSE	3-aminopyridine-like	x11041
3_mpro-x11044_0a_bound.pdb	O=C(Nc1c(C)ccnc1)[C@H](C)C1CCCCC1	TRY-UNI-714a760b-16	O=C(Nc1c(C)ccnc1)C(C)C1CCCCC1	TRY-UNI-714a760b-16		0		9.29343	18.3766			1	1		84.1198	FALSE	FALSE	3-aminopyridine-like	x11044
3_mpro-x11186_0a_bound.pdb	Clc1cc2[C@H](C(=O)Nc3n(C4CC4)cnn3)COc2cc1	NAU-LAT-8502cac5-2	Clc1cc2C(C(=O)Nc3n(C4CC4)cnn3)COc2cc1	NAU-LAT-8502cac5-2		0		18.3421	25.4753						83.2481	FALSE	FALSE	3-aminopyridine-like	x11186
3_mpro-x11225_0a_bound.pdb	O=C(Nc1c(C)ccnc1)C[C@@H]([N+H]1CCC(O)CC1)c1cscc1	PET-SGC-a8a902d9-1	O=C(Nc1c(C)ccnc1)CC(N1CCC(O)CC1)c1cscc1	PET-SGC-a8a902d9-1		0		-1.36883	4.2422						64.7076	FALSE	FALSE		x11225
3_mpro-x11231_0a_bound.pdb	Clc1cc2[C@H](C(=O)Nc3n(-c4ccccc4)cnn3)COc2cc1	NAU-LAT-8502cac5-6	Clc1cc2C(C(=O)Nc3n(-c4ccccc4)cnn3)COc2cc1	NAU-LAT-8502cac5-6		0		10.8917	19.9646						46.7588	FALSE	FALSE	3-aminopyridine-like	x11231
3_mpro-x11233_0a_bound.pdb	O=C(Nc1n(C2CC2)cnn1)[C@@]1(C)c2c(OCC1)cccc2	BRU-THA-a358fbdd-2	O=C(Nc1n(C2CC2)cnn1)C1(C)c2c(OCC1)cccc2	BRU-THA-a358fbdd-2		0		-3.06217	0.030976						0	FALSE	FALSE	3-aminopyridine-like	x11233
3_mpro-x11339_0a_bound.pdb	FC[C@H]1[C@H](C(=O)Nc2c(C)ccnc2)C1	ERI-UCB-5b47150d-6	FC[C@H]1[C@H](C(=O)Nc2c(C)ccnc2)C1	ERI-UCB-5b47150d-6		3.3542		4.10284	3.56646			1	1		0	FALSE	FALSE		x11339
3_mpro-x11346_0a_bound.pdb	O=C(Nc1n(C)cnn1)Cc1cc(C)cc(C)c1	JAG-UCB-a3ef7265-18	O=C(Nc1n(C)cnn1)Cc1cc(C)cc(C)c1	JAG-UCB-a3ef7265-18		0		-0.790851	-11.528			1	1		85.5273	FALSE	FALSE	3-aminopyridine-like	x11346
3_mpro-x11372_0a_bound.pdb	Clc1cc([C@@H](C(=O)Nc2c(NC(=O)C)ccnc2)C)ccc1	JAN-GHE-83b26c96-2	Clc1cc(C(C(=O)Nc2c(NC(=O)C)ccnc2)C)ccc1	JAN-GHE-83b26c96-2		21.5452		14.4452	44.6153			1	1		139.655	FALSE	FALSE	3-aminopyridine-like	x11372
3_mpro-x11426_0a_bound.pdb	Clc1cc(C[C@H](O)Cn2ncnc2)ccc1	JAG-UCB-cedd89ab-2
3_mpro-x11427_0a_bound.pdb	Fc1cc(CCC(=O)Nc2c(C)ccnc2)ccc1	BEN-DND-93268d01-5	Fc1ccc(CCC(=O)Nc2c(C)ccnc2)cc1	BEN-DND-93268d01-5		6.50779		1.94864	5.91784			1	1		188.167	FALSE	FALSE
3_mpro-x11454_0a_bound.pdb	Clc1cc(CC(=O)Nc2n3c(nc2)C=CC=C3)ccc1	PET-UNK-8df914d1-2	Clc1cc(CC(=O)Nc2n3c(nc2)C=CC=C3)ccc1	PET-UNK-8df914d1-2						8.03395	5.09507				151.096	FALSE	FALSE	3-aminopyridine-like	x11454
4_mpro-x12025_0a_bound_1.pdb	O=C(N1CC(Nc2c(OC)cccc2)C1)C=1c2c(NC(=O)C=1)cccc2.O=C(N1CC(Nc2c(OC)cccc2)C1)C=1c2c(NC(=O)C=1)cccc2	ERI-UCB-a0b0dbcb-8	O=C(N1CC(Nc2c(OC)cccc2)C1)C=1c2c(NC(=O)C=1)cccc2	ERI-UCB-a0b0dbcb-8			99			99.5					97.9584	FALSE	FALSE	quinolones	x12025
4_mpro-x12204_0a_bound.pdb	O=C(Cn1nnc2c1cccc2)N1CCC(C)CC1	ANT-DIA-62e4526e-1
4_mpro-x12719_0a_bound.pdb	O=C(Nc1c(C2CC2)ccnc1)C[N+H]1CCN(C(=O)C)CC1	EDJ-MED-3c65e9ce-2	O=C(Nc1c(C2CC2)ccnc1)CN1CCN(C(=O)C)CC1	EDJ-MED-3c65e9ce-2						99.5						FALSE	FALSE	3-aminopyridine-like
4_mpro-x12740_0a_bound.pdb	O=C(Nc1c(C)ccnc1)C[N+H]1CCC(C)CC1	EDJ-MED-3c65e9ce-4	O=C(Nc1c(C)ccnc1)CN1CCC(C)CC1	EDJ-MED-3c65e9ce-4						49.1501	4.30847					FALSE	FALSE	3-aminopyridine-like
xxxx_4.pdb	O=C(Nc1c(C)ccnc1)C	MAK-UNK-6435e6c2-8
xxxx_13.pdb	O=C(Nc1cnccc1)Nc1ccccc1	AAR-POS-d2a4d1df-11
xxxx_15.pdb	O=C(Nc1cnccc1)CC1CCCCC1	ALE-HEI-f28a35b5-9
xxxx_67.pdb	Clc1cc([C@H](NC(=O)C)C)ccc1	AAR-POS-0daf6b7e-10
6W63	O=C(NC1CCCCC1)[C@H](N(C(=O)c1nc[nH]c1)c1ccc(C(C)(C)C)cc1)c1cnccc1
7AKU	O=C(OCc1ccccc1)N[C@H](C(=O)N[C@H](CO)CCCC)CC(C)C
7ANS	[S@H0](=O)(C(c1ccccc1)c1ccccc1)CC(=O)NO
7AP6	Fc1c(Oc2c(O)cc(CC)c(F)c2)ccc(C(=O)N)c1
7AQJ	O=C1N(C[C@H](O)C)C(=O)N(C[C@@H]2OC2)C(=O)N1C[C@H]1OC1.O=C1N(C[C@@H]2OC2)C(=O)N(C[C@@H]2OC2)C(=O)N1C[C@@H]1OC1
7L5D	O=C(Nc1cc(/N=C/2\SC=C(c3cnccc3)N\2)c(C)cc1)c1ccc(C[N+H]2CC[N+H2]CC2)cc1
