# Supplementary material for: Automated discovery of noncovalent inhibitors of SARS-CoV-2 main protease by consensus Deep Docking of 40 billion small molecules
Source: Royal Society of Chemistry journal article supplement (doi:10.1039/d1sc05579h), 2021-01-01
Supplement: d1sc05579h3.xlsx [file d1sc05579h3.xlsx]

## Sheet: actives_poses_all_poses_filter_
Index	Structure	Mol Weight	smiles	CatalogId	5uM run1 %Inh	5uM run2 %Inh	5uM mean %Inh	IC50 (uM)	rank	list	S1	S1/S2_linker	S2	S1`/S3`	S3/S4	lipinski_druglike	oprea_leadlike	AUTODOCK	GLIDE	FRED	ICM	QUICKVINA
1		427.468	O=C(NC[C@@H]1N(C(=O)C=2c3n(nnn3)C=CC=2)CCc2c1cccc2)c1cc(C)cnc1	Z4921675438	31.1	25.7	28.4	10.84	24	2.2N	1	1	1	1		1	0			-12.9933
2		433.483	Fc1c(O)cc(C(=O)N2[C@H](CNC(=O)c3c4c(cnc3)cccc4)CC3(C2)CCC3)cc1	Z4927220858	26.4	27.4	26.9	11.2	103	1.1N	1	1	1		1	1	1				-36.6523
3		442.49	O=C(NC[C@H](NC(=O)c1c2c(scc2)cnc1)c1cc2c(cc1)cccc2)c1ncoc1	Z4921678803	19.1	19.3	19.2	12.13		expert_ICM	1	1	1	1		1	1				-35.2404
4		455.493	Fc1cc2c(C(=O)NC[C@H]3N(C(=O)/C=C/c4c[nH]nc4)CCc4c3cccc4)cncc2cc1	Z4921679285	15.1	15.6	15.3	18.67		expert_glide	1	1	1	1		1	0		-7.42495
5		430.508	O=C(NC[C@H]1N(C(=O)c2cc(O)c(N)cc2)CC2(C1)CCC2)c1c2c(cnc1)cccc2	Z4927220853	29.5	26.6	28.1	29.57	150	1.2N	1	1	1		1	1	1	-10.28	-8.4006	-11.6884	-34.1444	-9.5
6		456.55	O=C(N[C@H]1[C@H](CNC=2N=C3N(C(=O)C=2)C=CC=C3)CCC21CCC2)c1cnc2[nH]cc(C)c2c1	Z4921674023	17	18.7	17.9	32.73	75/283	2.1L_2.2L/2.0K	1	1	1		1	1	0	-10.77	-9.08491	-9.93373	-38.0435	-9.8
7		444.466	Fc1cc2c(C(=O)NC[C@@H]3c4c(cccc4)CN(C(=O)c4c(C)noc4)C3)cncc2cc1	Z4927221642	17.1	8.8	13	56.78		expert_glide	1	1	1	1		1	1		-6.96163
8		456.546	O=C(C[C@H](C)c1occc1)N1[C@@H](CNC(=O)c2c(C)ccc3[nH]ncc23)Cc2c(cccc2)C1	Z4927218624	11.1	11.6	11.3	56.92		expert_glide	1	1	1	1		1	0		-7.66284
9		452.53	O=C(NC[C@H](NC(=O)c1c2c(cnc1)cccc2)c1cc2c(cc1)cccc2)c1nscc1	Z4921678708	21.1	24.6	22.8	ND		expert_ICM	1	1	1	1		1	0				-35.4125
10		431.473	O=C(N1[C@@H]2C[C@@H]([C@H](NC(=O)C=3NC(=O)C=C([O-])C=3)CC2)C1)c1[nH]c(-c2ccccc2)cc1	Z4927220760	39.1	42.2	40.6	ND	221/118/127	1.1N/1.2O/1.2P	1	1	1	1		1	1	-9.94	-8.86878	-10.4513	-31.8803	-9.5
11		436.475	O=C(NC[C@H](NC(=O)c1c2c(cnc1)cccc2)c1cc2c(cc1)cccc2)c1n[nH]nc1	Z4921678724	13.6	13.2	13.4	ND		expert_ICM	1	1	1	1		1	1				-34.0319
12		437.499	O=C(N[C@@H](CNC(=O)C1=COCC1)c1cc2c(cc1)cccc2)c1c2c(cnc1)cccc2	Z4921678731	13.3	14.1	13.7	ND		expert_ICM	1	1	1	1		1	1				-32.8894
13		435.487	O=C(NC[C@H](NC(=O)c1c2c(cnc1)cccc2)c1cc2c(cc1)cccc2)c1[nH]cnc1	Z4927221401	18.9	19	19	ND		expert_ICM	1	1	1	1		1	1				-34.4177
14		450.502	O=C(NC[C@H](NC(=O)c1c2c(cnc1)cccc2)c1cc2c(cc1)cccc2)Cn1nncc1	Z4927221434	10.6	12.5	11.6	ND		expert_ICM	1	1	1	1		1	0				-39.7163
15		458.55	O=C(NC[C@H](NC(=O)c1c2c(scc2)cnc1)c1cc2c(cc1)cccc2)c1scnc1	Z4921678800	14.4	12.5	13.4	ND		expert_ICM	1	1	1	1		1	0				-32.5101
16		458.566	O=C(Cc1cc(C)cnc1)N1C[C@H]([C@H]2CN(C(=O)c3cn(-c4ncccc4)nc3)CC2)CCC1	Z4921675943	21.7	20.5	21.1	ND	82/140	1.1L/1.0K	1		1	1	1	1	0	-11.59	-9.43641	-10.3833	-35.6541	-10.4
17		457.49	O=C(N[C@H](CCCNC(=O)C1=CC(=O)NN=C1)c1ccccc1)C=1C=2C(=CC(=O)NC=2)C=CC=1	Z4921676401	12.4	15.9	14.1	ND	66/41	D/I	1	1	1		1	1	0	-9.89	-8.96934	-8.79971	-47.1576	-9.1
18		428.496	O=C(N1C[C@@H](N[C@@H]2N=C(c3ccccc3)Nc3c2cccc3)CC1)C=1N=C(C)NC(=O)C=1	Z4921663506	8.2	15.8	12		97/82	E/J	1	1	1		1	1	1	-9.62	-7.34157	-7.05058	-21.24	-11.3
19		441.443	FC(F)(C(=O)N[C@@H](CNC1=Nn2nnnc2C=C1)c1cc2c(cc1)cccc2)C(O)(C)C	Z4927220948	10.5	14.7	12.6		200	A	1	1	1		1	1	1	-12.32
20		427.468	O=C(NC[C@H]1N(c2n(-c3ccccc3)nnn2)Cc2c(cccc2)C1)C1=CC(=O)NC=C1	Z4927220963	11	11.6	11.3		111	1.2P	1	1	1	1		1	0	-9.67	-7.63243	-10.5592	-31.4852	-9.4
21		439.523	O=C(N1[C@@H]2[C@@H](Nc3nc(-c4cnccc4)nc(C)c3)C[C@H](C1)CC2)c1cnc2[nH]ccc2c1	Z4921673621	12.9	11.4	12.1		22/16/297	1.2N/1.2O/1.2P	1		1	1	1	1	1	-10.55	-8.53568	-12.0982	-35.5588	-9.8
22		453.55	O=C(N1[C@@H]2[C@@H](Nc3nc(-c4cnccc4)nc(C)c3)C[C@H](C1)CC2)c1cnc2[nH]cc(C)c2c1	Z4927220229	17.9	16.9	17.4		124/122	1.2L/1.2M	1		1	1		1	0			-12.4573
23		457.582	O=C(N1C[C@H](Nc2nc(-c3cnccc3)nc3c2CCC3)CCCCC1)c1c2n(nc1)CCC2	Z4921673722	7.6	16.2	11.9		48	1.2N	1		1	1	1	1	0	-10.85	-8.43061	-11.9753	-30.5506	-9.9
24		459.569	FCc1cc(C(=O)N2C[C@H](Nc3nc(-c4cnccc4)nc4c3CCC4)CCCCC2)ccc1	Z4927220507	8.8	12.4	10.6		106	1.2N	1		1	1	1	1	0	-10.94	-8.41175	-10.8457	-29.1176	-10
25		454.578	O=C(N1CC2(CCN(C=3N=C(C)n4c(nnc4)C=3)CC2)CCC1)c1cc2c(cc(C)cc2)cc1	Z4921664109	15.5	8.3	11.9		95	J	1		1	1	1	1	0	-10.93	-7.85255	-9.51327	-28.9188	-11.2
26		447.499	O=C(N[C@H]1[C@H]2N(C3=Nc4[nH]ncc4C(=O)N3)CC[C@H](C2)CC1)c1cc2C(=O)NCCc2cc1	Z4921673990	11.7	11.2	11.4		173/92	2.0K/J	1	1	1		1	1	0	-9.91	-8.02321	-13.6702	-27.0254	-11.2
27		451.491	O=C(NC[C@H]1[C@H]2N(C(=O)c3nc4n[nH]nc4cc3)C[C@@H](C1)CC2)[C@H]1CN2C(=O)NN=C2CC1	Z4927214646	14.4	12.3	13.4		185/158	2.1L_2.2L/2.2M	1	1	1		1	1	0		-9.40221
28		453.499	O=C(/C=C\C=1C(=O)NC(C)=NC=1)N1C[C@@H](NC(=O)C=2C(=O)NC=CC=2)CC2(C1)CCOCC2	Z4927215025	15.5	15.9	15.7		242/134	D/I	1	1	1		1	1	0				-45.395
29		440.463	O=C(NC[C@@H](NC(=O)c1c2c(C(=O)NC2)ccc1)c1ccccc1)c1c2c([nH]nc2)ncc1	Z4927219874	10	10.3	10.2		190	1.2P	1	1	1		1	1	0	-10.37	-8.33032	-9.72385	-27.1664	-9.3
30		459.51	O=C(N1C[C@@H](CCNC(=O)C2=CN3C(=O)NN=C3C=C2)CCC1)c1ccc(-c2[nH]cnc2)cc1	Z4927220112	12.4	8.7	10.5		177	2.1L_2.2L	1	1	1		1	1	0		-9.54645
31		396.447	O=C(NC1C[C@@H]2N(C(=O)C=3C=C(C)NC(=O)C=3)[C@H](C1)CCC2)C1=CC(=O)NC=C1	Z4927221743	12.8	13.5	13.2		246/135	D/I	1	1	1			1	1				-45.3596
32		452.511	O=C(/C=C/c1ccc(C(=O)N)cc1)N1C[C@@H]2N(C(=O)CCn3c(O)ccc3O)[C@H](C1)CCC2	Z4921675184	17.2	12.5	14.8		86/52	B/G			1	1	1	1	0	-8.16	-10.8484	-5.79871	-33.6415	-7.9
33		453.499	O=C(/C=C/c1ccc(C(=O)N)cc1)N1C[C@@]2(CN(C(=O)[C@H]3NC(=O)NC(=O)C3)CC2)CCC1	Z4921675191	14.7	15	14.9		90/82	2.1L_2.2L/2.2M	1	1	1		1	1	0	-11.62	-9.11114	-10.0749	-29.1276	-9.9
34		459.506	O=C(/C=C/c1cc2c(nccc2)cc1)N1C[C@@]2(CN(C(=O)C=3NC(=O)NC(=O)C=3)CC2)CCC1	Z4921675198	18	17.9	17.9		31/18/293	1.2N/1.2O/1.2P	1		1	1		1	0	-10.15	-8.88653	-10.8701	-34.7125	-10.2
35		451.57	O=C(NC[C@H](NC(=O)c1cnccc1)c1cc2c(cc1)cccc2)C(C)(C)c1ccc(C)cc1	Z4921678629	10.2	11	10.6			expert_ICM	1	1	1	1		1	0				-32.1744
36		439.519	O=C(NC[C@H](NC(=O)c1cnccc1)c1cc2c(cc1)cccc2)[C@H]1c2[nH]ncc2CCC1	Z4921678640	13.6	12.5	13.1			expert_ICM	1	1	1	1		1	1				-32.0984
37		402.454	O=C(N[C@@H](CNC(=O)C1=NOCC1)c1cc2c(cc1)cccc2)c1c(C)ccnc1	Z4921678664	10	13.8	11.9			expert_ICM	1	1	1	1		1	1				-35.5902
38		457.509	Fc1cc(C(=O)N[C@@H](CNC(=O)[C@H]2c3nc[nH]c3CCC2)c2cc3c(cc2)cccc3)cnc1	Z4927218341	13.1	10.2	11.6			expert_ICM	1	1	1	1		1	0				-32.1096
39		453.546	O=C(N[C@@H](CNC(=O)C1(c2c(C)cccc2)CC1)c1cc2c(cc1)cccc2)Cn1ncnc1	Z4927221425	6.1	14.9	10.5			expert_ICM	1	1	1	1		1	0				-32.7011
40		446.51	O=C(N[C@@H](CNC(=O)c1cnccc1)c1cc2c(cc1)cccc2)c1c2c(cnc1)cccc2	Z4921678687	12.6	12.3	12.4			expert_ICM	1	1	1	1		1	0				-34.6168
41		435.527	O=C(NC[C@H](NC(=O)c1c2c(cnc1)cccc2)c1cc2c(cc1)cccc2)[C@@H]1C2(C1)CC2	Z4921678719	8.6	18	13.3			expert_ICM	1	1	1	1		1	0				-35.0451
42		440.507	O=C(NC[C@H](NC(=O)c1nnccc1)c1cc2c(cc1)cccc2)[C@@H]1c2nc[nH]c2CCC1	Z4921678766	17.2	11.6	14.4			expert_ICM	1	1	1	1		1	1				-34.3211
43		452.474	O=C(N[C@@H](CNC(=O)c1n[nH]nc1)c1cc2c(cc1)cccc2)c1c(-c2ccccc2)onc1	Z4921678775	7.2	13.8	10.5			expert_glide	1	1	1	1		1	0		-7.94059
44		451.49	O=C(N[C@@H](CNC(=O)c1c[nH]nc1)c1cc2c(cc1)cccc2)c1c(-c2ncccc2)[nH]nc1	Z4921678782	10.7	11	10.9			expert_ICM	1	1	1	1		1	0				-40.7278
45		440.463	O=C(NC[C@@H](NC(=O)C1=CC(=O)NN=C1)c1cc2c(cc1)cccc2)/C=C\c1nccnc1	Z4921675214	14.9	11.4	13.2		34/21	D/I	1	1	1		1	1	1	-9	-7.60834	-8.19261	-47.7488	-9.1
46		450.498	O=C(N[C@@H](CNC(=O)c1ccccc1)c1cc2c(cc1)cccc2)c1c(-c2cocc2)[nH]nc1	Z4921678788	13.2	13.9	13.5			expert_ICM	1	1	1	1		1	0				-33.3148
47		451.49	O=C(N[C@@H](CNC(=O)c1cc(N)ccc1)c1cc2c(cc1)cccc2)c1cnc2n[nH]nc2c1	Z4927221457	9.2	12	10.6			expert_ICM	1	1	1	1		1	0				-31.3044
48		458.478	O=C(NC[C@H](NC(=O)C1=NNC(=O)CC1)c1cc2c(cc1)cccc2)/C=C\C=1C(=O)NC=NC=1	Z4921675234	16.8	16	16.4		5/4	D/I	1	1	1		1	1	0	-9.84	-7.22069	-6.46926	-49.2438	-8.5
49		451.89	Clc1c(C(=O)N[C@@H](CNC(=O)c2c(C)[nH]cn2)c2cc3c(cc2)cccc3)c(F)ncc1	Z4927221668	13.3	8.7	11			expert_glide	1	1	1	1		1	1		-8.72927
50		455.474	O=C(NC[C@H](NC(=O)c1c2c(C(=O)NCC2)cnc1)c1cc2c(cc1)cccc2)c1nocc1	Z4921678833	12.1	9.9	11			expert_glide	1	1	1	1		1	0		-7.76678
51		456.506	O=C(NC[C@H](NC(=O)c1[nH]nc2N=CNC(=O)c12)c1cc2c(cc1)cccc2)/C(/C)=C\1/CCC/1	Z4927221391	15.1	15	15.1			expert_ICM	1	1	1	1		1	0				-35.6048
52		455.518	O=C(N[C@@H](CNC(=O)[C@]1(C)C(=O)NCC1)c1cc2c(cc1)cccc2)c1c2c([nH]cc2)cnc1	Z4921679142	13.7	13.8	13.7			expert_ICM	1	1	1	1		1	0				-34.7773
53		422.488	O=C(N[C@@H](CNC(=O)C1(C#C)CC1)c1cc2c(cc1)cccc2)c1c2c([nH]cc2)cnc1	Z4921679153	15.8	13.9	14.8			expert_glide	1	1	1	1		1	1		-8.34892
54		447.583	O=C(N1C[C@]2(CN(C(=O)c3c4nc[nH]c4cnc3)CC2)CCCC1)[C@H]1C[C@@H]2C=CC[C@H](C1)C2	Z4921758507	10.5	11.4	10.9		77/110/19	E/2.0K/J	1		1	1		1	1	-10.8	-6.88037	-13.0813	-31.4321	-11.4
55		457.494	O=C(N[C@@H](C)[C@H]1CN(C(=O)c2nccc(-c3ccccc3)c2)CC1)c1[nH]nc2N=CNC(=O)c12	Z4921675282	18.7	15.2	17		130/42/17	1.1N/1.1O/1.1P	1		1	1	1	1	0	-10.09	-8.49377	-9.84799	-33.5472	-10.1
56		453.543	O=C(Cc1cnccc1)N1C[C@@H]([C@@H]2CN(C(=O)C3CC4(C(=O)NC(=O)N4)C3)CCC2)CCC1	Z4921675306	10.4	11.9	11.1		235/228/32/126	A/1.0K/2.0K/F	1		1	1	1	1	0	-12.29	-9.11519	-12.9273	-22.2239	-10.4
57		436.472	O=C(N1CC2(OCC1)CN(C(=O)c1[nH]c3c(c1)ccc(O)c3)C2)[C@@H]1Cc2n[nH]nc2CC1	Z4927220566	9.8	11.9	10.8		163	G			1	1	1	1	0		-10.5472
58		449.551	O=C(Cc1cc(C)cnc1)N1CC2(O[C@@H](CNC(=O)[C@]3(O)Cc4c(cccc4)CC3)CC2)C1	Z4927215001	13.9	13	13.5		282/122	C/H	1		1	1		1	1			-14.8127
59		456.462	O=C(NC[C@@H]1N(C(=O)C=2C(=O)NC(=O)NN=2)Cc2c(cccc2)C1)c1c2c(ccnc2)ccc1	Z4921675343	13	9.3	11.1		91/62	1.1O/1.1P	1	1	1	1		1	0	-9.73	-7.83069	-10.5604	-33.8088	-9.3
60		444.51	O=C(N1[C@H](CNC(=O)C2=CC(=O)NN=C2)Cc2c(cccc2)C1)[C@H]1CS(=O)(=O)CCC1	Z4921675344	13.1	10.8	12		40	A	1	1	1		1	1	1	-12.58
61		433.468	O=C(N1[C@H](CNC(=O)C2=CC(=O)NN=C2)Cc2c(cccc2)C1)c1noc2c1CCCC2	Z4921675347	6.6	17.5	12.1		38/28	A/F	1	1	1		1	1	0	-12.59
62		415.457	O=C(NC[C@H]1N(C(=O)c2nnn(C)c2)Cc2c(cccc2)C1)c1c2c([nH]nc2)ccc1	Z4921679205	11.9	13.6	12.8			expert_glide	1	1	1	1		1	0		-7.2895
63		415.453	O=C(NC[C@H]1N(C(=O)c2c(C)con2)Cc2c(cccc2)C1)c1c2c([nH]nc2)ccc1	Z4921679213	9.9	10.8	10.3			expert_glide	1	1	1	1		1	1		-7.04197
64		451.49	O=C(NC[C@H]1N(C(=O)c2nnn3c2C=CC=C3)Cc2c(cccc2)C1)c1c2c([nH]nc2)ccc1	Z4921679227	7.9	12.8	10.3			expert_glide	1	1	1	1		1	0		-7.74466
65		448.52	Fc1sc(C(=O)N2[C@H](CNC(=O)c3c4c([nH]nc4)ccc3)Cc3c(cccc3)C2)c(C)c1	Z4927221613	18.3	12.3	15.3			expert_glide	1	1	1	1		1	1		-6.80005
66		444.55	O=C(NC[C@H]1N(C(=O)c2c(CC)csc2)Cc2c(cccc2)C1)c1c2c([nH]nc2)ccc1	Z4927221611	10.8	10.8	10.8			expert_glide	1	1	1	1		1	1		-7.14922
67		458.474	O=C(N1[C@H](CNC(=O)C=2N=C(C)NC(=O)C=2)c2c(cccc2)CC1)c1c2c(oc1)cc(O)cc2	Z4927220008	16.8	18.1	17.4		191/100	B/G	1	1	1		1	1	0		-10.6745
68		442.494	Fc1c(C(=O)NC[C@H]2N(C(=O)c3c4c([nH]cc4)ccc3)CCc3c2cccc3)cc(C)cn1	Z4927221638	10.9	9	10			expert_glide	1	1	1	1		1	1		-7.19315
69		459.422	O=[N+]([O-])c1c(C(=O)N[C@H]2[C@H](NC(=O)c3nc4nn[nH]c4cc3)Cc3c2cccc3)cc(O)cc1	Z4921665433	14.3	6.3	10.3		23/22	A/F	1	1	1		1	1	0	-12.63
70		449.526	FC1=CC=2[C@@H](OC=C(C(=O)N3C[C@@H]([C@@H]4CN(C(=O)Cc5cnccc5)CCC4)CC3)C=2)C=C1	Z4921675784	16.4	15.4	15.9		89/153	1.1L/1.0K	1		1	1	1	1	1					-10.4
71		447.535	O=C(N1C[C@H]([C@H]2CN(C(=O)c3c4NC(=O)Oc4ccc3)CCC2)CC1)c1c(C)ccc(C)c1	Z4921675874	13.4	11.2	12.3		221/67/186	2.1L_2.2L/2.1M/2.2M	1		1	1		1	1	-11.07
72		432.528	O=C(Cc1cc(C)cnc1)N1C[C@H]([C@H]2CN(C(=O)c3c4n(nc3)C=CC=N4)CC2)CCC1	Z4927217083	9.3	11.1	10.2		131/129	1.2L/1.2M	1		1	1		1	1			-12.8631
73		456.59	O=C(Cc1cc(C)cnc1)N1C[C@@H]([C@@H]2CN(C(=O)c3cnc4c(c3)ccc(C)c4)CC2)CCC1	Z4921676211	11.4	10.5	10.9		16/14/0/0/30	1.1L/1.1M/1.2L/1.2M/1.0K	1		1	1	1	1	0				-37.4051
74		459.506	O=C(N1C[C@H]([C@H]2CN(C(=O)c3nc4NC(=O)Nc4cc3)CCC2)CC1)c1oc2c(c1)cccc2	Z4921676224	18.8	20.1	19.4		39	E	1		1	1		1	0	-10	-7.78602	-9.11054	-24.4447	-11.4
75		450.499	O=C(N1C[C@H]([C@@H]2CN(C(=O)C3=CC(=O)NN=C3)CC2)CCC1)c1cc2NC(=O)NCc2cc1	Z4927214626	8.2	14.9	11.5		256/119	E/J	1	1	1	1		1	0					-11.2
76		454.534	O=C(N1C[C@H]([C@H]2CN(C(=O)C=3c4n(cnn4)C=CC=3)CCC2)CC1)c1cc2ncccc2cc1	Z4927215645	12.1	10.1	11.1		107/106	1.2L/1.2M	1		1	1		1	0		-9.29727
77		450.499	O=C(N1[C@H](CNC(=O)C2CC3(C(=O)NC(=O)N3)C2)CC2(C1)CCC2)C1=Cc2n(ccn2)C=C1	Z4921676728	11.6	8.4	10		27	1.2N	1	1	1		1	1	0	-10.56	-8.7647	-12.2164	-32.7379	-9.8
78		441.495	O=C(NC[C@H]1N(C(=O)c2cc3nccnc3cc2)CC2(C1)CCC2)c1c2nc[nH]c2cnc1	Z4927218902	18.2	14.6	16.4		166	1.1N	1	1	1		1	1	0			-12.27
79		424.461	O=C(NC[C@H]1N(C(=O)C2CC(=O)NC(=O)C2)CC2(C1)CCC2)c1c2nc[nH]c2cnc1	Z4921676768	10.9	11.9	11.4		71	1.1N	1	1	1		1	1	0			-12.2909
80		419.485	O=C(NC[C@H]1N(C(=O)c2cc(O)c(C)cc2)CC2(C1)CCC2)c1c2nc[nH]c2cnc1	Z4921676779	17.1	16.1	16.6		96	2.0K	1	1	1		1	1	1	-9.78	-9.53007	-13.4596	-33.2938	-10
81		459.587	O=C(NC[C@H]1N(C(=O)[C@H]2C3(CCOCC3)CCC2)CC2(C1)CCC2)CC1CC(=O)NC(=O)C1	Z4921676853	17.5	13.7	15.6		14/14	A/F	1	1	1		1	1	0	-12.67
82		447.535	O=C(Cc1c(O)cccc1)N1[C@@H](CNC(=O)c2cc3c(C(=O)NCC3)cc2)CC2(C1)CCC2	Z4927220700	17.6	15	16.3		117	A	1	1	1		1	1	1	-12.39
83		442.476	O=C(NC[C@H]1N(C(=O)[C@H]2NC(=O)NC(=O)C2)CC2(C1)CCC2)/C=C\C=1C(=O)NC(C)=NC=1	Z4927214799	16.1	16.2	16.1		233/130	D/I	1	1	1		1	1	1				-45.4622
84		448.527	O=C(NC[C@H]1N(C(=O)c2cnc3n(C)nc(C)c3c2)CC2(C1)CCOCC2)c1cnccc1	Z4927221193	9.1	13.1	11.1		156	1.2N	1	1	1		1	1	0	-10.81	-8.05009	-11.4994	-31.0586	-9.7
85		434.496	O=C(NC[C@H]1N(C(=O)C2=Cc3c(OC2)cccc3)CC2(C1)CCOCC2)c1cncnc1	Z4921677000	8.3	14.1	11.2		19	1.1N	1	1	1		1	1	1				-38.4271
86		435.484	O=C(NC[C@H]1N(C(=O)c2cc3C(=O)NCc3cc2)CC2(C1)CCOCC2)c1nnccc1	Z4927220682	10.4	9.9	10.1		192	2.0K	1	1	1		1	1	0					-10.6
87		444.463	Fc1cc(C(=O)N)cc(C(=O)N2[C@H](CNC(=O)c3c(C)cno3)CC3(C2)CCOCC3)c1	Z4921677043	12.9	14.1	13.5		72/130	1.1O/1.1P	1	1	1		1	1	1	-10.87	-7.80968	-8.56028	-31.1617	-10
88		452.555	O=C(C[C@H]1C[C@@H](O)CC1)N1CC2(Oc3c(cccc3)C1)CCN(C(=O)c1n[nH]c(C)c1)CC2	Z4927215129	10.9	11.6	11.2		189	F	1	1	1		1	1	0	-12.21
89		437.496	O=C(N1CCC2(Oc3c(cccc3)CN(C(=O)C3CC(O)C3)C2)CC1)C1=CC(=O)NC=C1	Z4927221800	18.9	11.7	15.3		171	G	1	1	1		1	1	1		-10.5385
90		459.546	O=C(N1CC2(Oc3c(cccc3)C1)CCN(C(=O)c1cc(C#C)cnc1)CC2)[C@@H]1[C@@H](O)CCC1	Z4921677424	9.3	10.8	10		113/68	A/F	1	1	1		1	1	0	-12.39	-7.35648	-10.3561	-33.0137	-8.2
91		457.534	O=C(N1CCC2(Oc3c(cccc3)CN(C(=O)C3CC(=C)C3)C2)CC1)c1c2nc[nH]c2cnc1	Z4921668131	7.8	16.8	12.3		96	1.0K	1	1	1		1	1	0					-11.1
92		441.444	O=C(C[C@@H]1C(=O)NC(=O)N1)N1C[C@H](CO)C2(C1)CN(C(=O)c1[nH]c3c(c1)ccc(O)c3)C2	Z4921677511	14.7	16.1	15.4		15/11	B/G			1	1	1	1	0	-9.29	-11.2478	-6.59145	-24.0919	-8.1
93		419.485	O=C(N1CC([C@@H]2CN(C(=O)C3=CNC(=O)C=C3)CCCC2)C1)c1c2c([nH]cc2)cnc1	Z4921677517	17.5	15.8	16.7		14/12	C/H	1	1	1		1	1	1	-9.29	-7.06086	-15.7858	-28.0748	-8.4
94		445.523	O=C(N1CC([C@@H]2CN(C(=O)c3cc4c(cc3)COC4)CCCC2)C1)c1c2nc[nH]c2cnc1	Z4927221008	14.2	18.4	16.3		175/171	1.2L/1.2M	1	1	1		1	1	1			-12.7817
95		449.551	O=C(N1CC([C@@H]2CN(C(=O)c3cc4OC(C)(C)Cc4cc3)CCCC2)C1)c1cc(O)cnc1	Z4927220661	8.7	14.4	11.5		151	2.2M	1	1	1		1	1	1	-10.97	-8.50025	-10.6088	-27.8379
96		453.547	O=C(CC[C@H]1CNC(=O)CC1)N1C[C@H](C2CN(C(=O)c3cnc4n[nH]nc4c3)C2)CCCC1	Z4927216465	16.5	11.5	14		195	F	1	1	1		1	1	0	-12.21
97		452.515	O=C(N[C@H]1C2(CCN(C(=O)c3c4nc[nH]c4cnc3)CC2)CCCC1)Cn1c(O)ccc1O	Z4927219854	13.8	7.4	10.6		174	B	1	1	1		1	1	0		-10.688
98		429.48	O=C(/C=C/c1cnccc1)N1C[C@H](CNC(=O)c2cc(C(=O)N)[nH]c2)c2c(cccc2)C1	Z4927214905	59.3	9.5	34.4		195	H	1	1	1		1	1	1			-14.6065
99		441.488	O=C(C[C@@H]1C(=O)NC(=O)N1)N1C[C@]23[C@](C1)(CN(C(=O)C=1C(C)=CC(=O)NC=1)C2)CCCC3	Z4921677679	12.9	9.7	11.3		85/78	2.1L_2.2L/2.2M			1	1	1	1	0	-10.34	-9.03015	-12.9823	-35.6891	-9.2
100		460.542	O=C(N1CCC2([C@H](NC(=O)C3=CN=C4NNN=C4C3)CCC2)CC1)c1c2n[nH]c(C)c2ccc1	Z4921671847	10.9	9.1	10		67	E	1		1		1	1	0	-11.08	-7.66775	-11.1554	-20.9284	-11.4
101		451.483	O=C(N[C@H]1C2(CN(C(=O)c3c4C(=O)NCc4ccc3)C2)CCC1)CCN1C(=O)C(=O)NC=C1	Z4927220713	12.8	14	13.4		287/123	C/H	1	1	1		1	1	0			-14.8065
102		453.474	Fc1c(C(=O)N2C[C@H](CNC(=O)c3cc4n[nH]nc4cc3)[C@@]3(COCC3)CC2)cc(O)cc1	Z4927221200	15.6	13.8	14.7		233/196	2.1L_2.2L/2.2M	1	1	1		1	1	0		-9.6826
103		455.559	O=C(CCC1=C(C)N=C(C)NC1=O)N1C[C@]23[C@](C1)(CN(C(=O)[C@H]1CNC(=O)CC1)C2)CCC3	Z4927219557	13.9	12.8	13.3		179	G			1	1	1	1	0		-10.5274
104		444.535	O=C(N[C@H]1[C@]2(CN(C(=O)C3=CC(=O)NC=C3)CCC2)CCCC1)c1c2c(cnc1)cccc2	Z4927221099	12.9	10.5	11.7		191	I	1	1	1			1	1				-44.7338
105		457.494	O=C(N1C[C@@H](NC(=O)C2=CN=C3NNC(C)=C3C2)Cn2c(ncc2)C1)c1oc2c(c1)cccc2	Z4927220211	11.3	10.7	11		143	E	1	1	1		1	1	0					-11.3
106		457.498	O=C(N[C@@H]1CN(C(=O)C2=Cn3nccc3C=C2)Cc2n(ccn2)C1)C1=CN=C2NNC(C)=C2C1	Z4921677871	11.9	11.2	11.5		87/16	1.0K/2.0K	1	1	1		1	1	0					-11.2
107		457.49	F[C@@H]1CN(C(=O)c2[nH]nc([C@H]3[N+@H](C)CCC3)c2)[C@H](CNC(=O)c2nn3c(C(=O)NC=C3)c2)C1	Z4921677924	7.3	14.8	11.1		99/58	D/I	1	1	1	1		1	0	-7.52	-8.00613	-6.74039	-46.6274	-8.5
108		433.552	O=C(Cc1cc(O)cnc1)N1[C@@H]2C[C@@H]([C@H](NC(=O)[C@]3(C)Cc4c(cccc4)CC3)CC2)C1	Z4921677946	13.8	12.2	13		20/18	C/H	1		1	1		1	1	-9.61	-7.03532	-15.6962	-27.6693	-9.6
109		458.482	O=C(N[C@H]1[C@H]2CN(C(=O)c3cc(-n4ncnc4)ccc3)[C@H](C2)CC1)c1nn2c(C(=O)NC=C2)c1	Z4921678004	12.2	9.4	10.8		109/31/11/163	1.1N/1.1O/1.1P/1.2N	1	1	1	1		1	0	-10.24	-8.65805	-10.4827	-33.2004	-9.8
110		453.587	O=C(N[C@H]1[C@H]2CN(C(=O)CN3C(=O)N(C)C(C)=N3)[C@H](C2)CC1)/C=C/1\C2CC3CC\1CC(C2)C3	Z4927219744	10.8	12.4	11.6		176/111	1.1L/1.1M	1		1	1		1	0					-10.6
111		449.511	O=C(N1[C@H]([C@H]2CN(C(=O)C=3C=C(CC)NC(=O)C=3)CC2)CCC1)c1cc2nc(N)oc2cc1	Z4921678116	9.5	14	11.7		99	1.2O	1		1	1	1	1	0	-10.56	-8.24885	-9.92205	-32.1606	-9.8
112		436.468	O=C(N1[C@H]([C@H]2CN(C(=O)C=3N=C(C)NC(=O)C=3)CC2)CCC1)c1cc(O)c2c(occ2)c1	Z4921678145	12.2	11.8	12		75/56/1/1/3/129	1.1L/1.1M/1.1N/1.1O/1.1P/1.0K	1	1	1		1	1	0	-10.88	-10.0587	-11.5967	-34.3181	-10.2
113		430.89	Clc1c(C(=O)N2[C@H]([C@H]3CN(C(=O)C=4N=C(C)NC(=O)C=4)CC3)CCC2)cc(O)cc1	Z4927216986	8.5	13.3	10.9		153/252	1.1N	1		1		1	1	1	-10.08	-8.69248	-10.646	-33.4465	-9.6
114		435.488	O=C(N1[C@H]([C@H]2CN(C(=O)C=3N=C(C)NC(=O)C=3)CC2)CCC1)c1cc(C)c2n[nH]nc2c1	Z4921678149	12.9	8.1	10.5		30/30/2/120	2.1L_2.2L/2.2M/2.2N/2.0K	1	1	1		1	1	0	-10.71	-8.6484	-13.2261	-35.5919	-9.7
115		442.479	O=C(NCC[C@H]1N(C(=O)c2ncnc3[nH]ccc23)CCc2c1cccc2)c1c[n+]([O-])ccc1	Z4927219454	12.8	14.1	13.4		165	I	1	1	1		1	1	0				-44.9843
116		418.417	O=C(N1C[C@@H](c2nnn(-c3cnccc3)c2)OCC1)c1cc(C2=NNC(=O)N2)ccc1	Z4927221021	4.5	16.1	10.3		144/126	1.2O/1.2P	1	1	1	1		1	0	-9.76	-8.40722	-11.3672	-28.9547	-9.7
117		413.481	O=C(CCc1c2c(cnc1)cccc2)N1c2c(-c3nnn(CCO)c3)cccc2CC1	Z4927221908	18.9	23.3	21.1		126	2.1M	1	1	1		1	1	1			-12.6366
