# Supplementary material for: Automated discovery of noncovalent inhibitors of SARS-CoV-2 main protease by consensus Deep Docking of 40 billion small molecules
Source: Royal Society of Chemistry journal article supplement (doi:10.1039/d1sc05579h), 2021-01-01
Supplement: d1sc05579h4.xlsx [file d1sc05579h4.xlsx]

## Sheet: tanimoto
inhibitor	tanimoto_7KX5	tanimoto_4_mpro-x12423_0a_bound.pdb	tanimoto_mpro-n0066_0b_bound.pdb	tanimoto_6M2N	tanimoto_3_mpro-x10789_0a_bound.pdb	tanimoto_mpro-n0029_0a_bound.pdb	tanimoto_4_mpro-x12419_0a_bound.pdb	tanimoto_7JU7	tanimoto_7L0D	tanimoto_2_mpro-x10236_0a_bound.pdb	tanimoto_mpro-n0050_0a_bound.pdb	tanimoto_2_mpro-x2119_0a_bound.pdb	tanimoto_2_mpro-x2193_0a_bound.pdb	tanimoto_2_mpro-x2540_0a_bound.pdb	tanimoto_2_mpro-x2563_0a_bound.pdb	tanimoto_2_mpro-x2694_0a_bound.pdb	tanimoto_2_mpro-x2703_0a_bound.pdb	tanimoto_2_mpro-x2705_0a_bound.pdb	tanimoto_2_mpro-x2764_0a_bound.pdb	tanimoto_2_mpro-x2776_0a_bound.pdb	tanimoto_2_mpro-x2910_0a_bound.pdb	tanimoto_2_mpro-x10355_0a_bound.pdb	tanimoto_2_mpro-x10403_0a_bound.pdb	tanimoto_2_mpro-x10419_0a_bound.pdb	tanimoto_3_mpro-x10525_0a_bound.pdb	tanimoto_3_mpro-x10700_0a_bound.pdb	tanimoto_3_mpro-x10959_0a_bound.pdb	tanimoto_3_mpro-x10995_0a_bound.pdb	tanimoto_3_mpro-x11313_0a_bound.pdb	tanimoto_3_mpro-x11366_0a_bound.pdb	tanimoto_3_mpro-x11498_0a_bound.pdb	tanimoto_3_mpro-x11499_0a_bound.pdb	tanimoto_3_mpro-x11501_0a_bound.pdb	tanimoto_3_mpro-x11508_0a_bound.pdb	tanimoto_3_mpro-x11530_0a_bound.pdb	tanimoto_4_mpro-x11541_0a_bound.pdb	tanimoto_4_mpro-x11542_0a_bound.pdb	tanimoto_4_mpro-x11548_0a_bound.pdb	tanimoto_4_mpro-x11609_0a_bound.pdb	tanimoto_4_mpro-x11616_0a_bound.pdb	tanimoto_4_mpro-x11642_0a_bound.pdb	tanimoto_4_mpro-x11790_0a_bound.pdb	tanimoto_4_mpro-x11813_0a_bound.pdb	tanimoto_4_mpro-x11831_0a_bound.pdb	tanimoto_4_mpro-x12000_0a_bound.pdb	tanimoto_4_mpro-x12064_0a_bound.pdb	tanimoto_4_mpro-x12073_0a_bound.pdb	tanimoto_4_mpro-x12171_0a_bound.pdb	tanimoto_4_mpro-x12202_0a_bound.pdb
Z4921675438	0.156863	0.161616	0.197802	0.11236	0.206186	0.186275	0.16129	0.211009	0.133333	0.1875	0.155963	0.0641026	0.0963855	0.158416	0.168675	0.162162	0.152381	0.158879	0.2	0.168224	0.197802	0.177083	0.183908	0.182796	0.173469	0.22093	0.170455	0.150538	0.202128	0.191011	0.177083	0.182796	0.175824	0.153846	0.152174	0.202247	0.166667	0.150538	0.184783	0.166667	0.156863	0.153061	0.215909	0.202128	0.202247	0.197802	0.185567	0.177083	0.193548
Z4927220858	0.135922	0.128713	0.241379	0.139535	0.171717	0.22449	0.114583	0.190909	0.134615	0.177083	0.179245	0.0379747	0.097561	0.137255	0.263158	0.122807	0.121495	0.12844	0.202247	0.137615	0.213483	0.217391	0.243902	0.159574	0.2	0.168539	0.275	0.177778	0.178947	0.22093	0.272727	0.184783	0.261905	0.223529	0.22093	0.292683	0.223529	0.204545	0.285714	0.206522	0.244681	0.217391	0.358974	0.258427	0.218391	0.186813	0.280899	0.272727	0.195652
Z4921678803	0.185567	0.131313	0.164835	0.103448	0.151515	0.18	0.117021	0.183486	0.115385	0.14433	0.171429	0.0526316	0.0731707	0.175258	0.220779	0.166667	0.18	0.163462	0.206897	0.173077	0.191011	0.182796	0.190476	0.163043	0.191489	0.159091	0.219512	0.168539	0.157895	0.144444	0.235955	0.163043	0.209302	0.2	0.197674	0.223529	0.214286	0.195402	0.204545	0.135417	0.197917	0.208791	0.283951	0.222222	0.168539	0.139785	0.217391	0.182796	0.16129
Z4921679285	0.12844	0.132075	0.212766	0.106383	0.173077	0.2	0.13	0.17094	0.107143	0.15534	0.159292	0.0731707	0.0909091	0.140187	0.214286	0.135593	0.125	0.141593	0.202128	0.130435	0.212766	0.255319	0.213483	0.173469	0.263158	0.182796	0.213483	0.142857	0.204082	0.193548	0.229167	0.173469	0.217391	0.170213	0.168421	0.244444	0.182796	0.166667	0.23913	0.181818	0.217822	0.191919	0.302326	0.229167	0.178947	0.1875	0.22449	0.229167	0.195876
Z4927220853	0.125	0.117647	0.241379	0.126437	0.16	0.212121	0.114583	0.190909	0.134615	0.164948	0.146789	0.0379747	0.097561	0.126214	0.263158	0.113043	0.111111	0.118182	0.202247	0.127273	0.213483	0.191489	0.228916	0.159574	0.175258	0.168539	0.259259	0.152174	0.178947	0.179775	0.244444	0.172043	0.247059	0.209302	0.193182	0.277108	0.209302	0.191011	0.255814	0.193548	0.231579	0.217391	0.358974	0.244444	0.204545	0.186813	0.252747	0.244444	0.222222
Z4921674023	0.115044	0.138889	0.17	0.103093	0.213592	0.216981	0.137255	0.176471	0.133929	0.150943	0.135593	0.0833333	0.076087	0.126126	0.166667	0.151261	0.141593	0.168142	0.137255	0.146552	0.17	0.163462	0.168421	0.145631	0.149533	0.202128	0.168421	0.138614	0.186275	0.151515	0.186275	0.156863	0.173469	0.164948	0.151515	0.185567	0.153061	0.15	0.17	0.132075	0.155963	0.152381	0.185567	0.174757	0.185567	0.158416	0.194175	0.19802	0.15534
Z4927221642	0.141509	0.134615	0.204301	0.108696	0.165049	0.169811	0.132653	0.163793	0.119266	0.158416	0.183486	0.0487805	0.0930233	0.176471	0.219512	0.168142	0.137615	0.144144	0.206522	0.142857	0.191489	0.234043	0.191011	0.153061	0.242105	0.173913	0.218391	0.157895	0.195876	0.197802	0.247312	0.164948	0.235955	0.186813	0.172043	0.264368	0.186813	0.157895	0.230769	0.185567	0.21	0.195876	0.309524	0.234043	0.170213	0.217391	0.242105	0.221053	0.151515
Z4927218624	0.19802	0.12381	0.12	0.0967742	0.176471	0.192308	0.132653	0.163793	0.173077	0.125	0.183486	0.0487805	0.0804598	0.142857	0.162791	0.157895	0.169811	0.165138	0.180851	0.153153	0.178947	0.171717	0.177778	0.141414	0.191919	0.16129	0.139785	0.122449	0.208333	0.147368	0.148515	0.141414	0.157895	0.136842	0.123711	0.170213	0.125	0.122449	0.142857	0.127451	0.141509	0.148515	0.182796	0.16	0.157895	0.154639	0.168317	0.16	0.163265
Z4921678708	0.186813	0.129032	0.222222	0.126582	0.175824	0.21978	0.113636	0.173077	0.112245	0.155556	0.171717	0.0428571	0.08	0.175824	0.298507	0.166667	0.180851	0.175258	0.225	0.185567	0.2375	0.211765	0.256757	0.204819	0.235294	0.1875	0.291667	0.182927	0.183908	0.185185	0.256098	0.204819	0.25974	0.25	0.21519	0.276316	0.25	0.2125	0.269231	0.186047	0.255814	0.271605	0.366197	0.256098	0.182927	0.178571	0.235294	0.240964	0.147727
Z4927220760	0.121212	0.113402	0.159091	0.194805	0.134021	0.212766	0.10989	0.136364	0.108911	0.163043	0.0818182	0.0410959	0.0909091	0.0891089	0.139241	0.079646	0.0754717	0.0934579	0.122222	0.0825688	0.2	0.191011	0.230769	0.157303	0.186813	0.166667	0.129412	0.0989011	0.177778	0.2375	0.164835	0.144444	0.111111	0.139535	0.125	0.136364	0.126437	0.111111	0.133333	0.193182	0.121212	0.104167	0.111111	0.12766	0.136364	0.228916	0.148936	0.177778	0.130435
Z4921678724	0.188889	0.11828	0.209877	0.1	0.177778	0.208791	0.114943	0.174757	0.102041	0.157303	0.173469	0.0588235	0.0810811	0.177778	0.30303	0.168317	0.182796	0.202128	0.197531	0.1875	0.225	0.2	0.243243	0.192771	0.223529	0.175	0.295775	0.185185	0.172414	0.17284	0.259259	0.178571	0.263158	0.253333	0.217949	0.28	0.253333	0.21519	0.272727	0.174419	0.258824	0.243902	0.371429	0.259259	0.185185	0.166667	0.238095	0.259259	0.149425
Z4921678731	0.195652	0.114583	0.216867	0.109756	0.172043	0.189474	0.111111	0.169811	0.121212	0.164835	0.18	0.0416667	0.0921053	0.184783	0.289855	0.174757	0.177083	0.171717	0.190476	0.181818	0.188235	0.166667	0.202532	0.159091	0.202247	0.154762	0.283784	0.178571	0.153846	0.166667	0.296296	0.2	0.253165	0.24359	0.209877	0.302632	0.24359	0.207317	0.2625	0.168539	0.25	0.235294	0.356164	0.3125	0.207317	0.147727	0.258824	0.25	0.183908
Z4927221401	0.188889	0.11828	0.209877	0.1	0.177778	0.195652	0.114943	0.163462	0.102041	0.157303	0.173469	0.0746269	0.0810811	0.177778	0.30303	0.168317	0.182796	0.189474	0.197531	0.1875	0.209877	0.186047	0.226667	0.178571	0.223529	0.189873	0.295775	0.185185	0.172414	0.158537	0.259259	0.178571	0.263158	0.253333	0.217949	0.28	0.253333	0.21519	0.272727	0.16092	0.258824	0.243902	0.371429	0.259259	0.185185	0.152941	0.238095	0.259259	0.149425
Z4927221434	0.191489	0.147368	0.211765	0.0941176	0.180851	0.185567	0.146067	0.188679	0.107843	0.173913	0.176471	0.0547945	0.0897436	0.180851	0.3	0.171429	0.185567	0.191919	0.186047	0.19	0.197674	0.163043	0.2125	0.168539	0.184783	0.151163	0.293333	0.216867	0.163043	0.162791	0.244186	0.181818	0.246914	0.269231	0.234568	0.311688	0.285714	0.231707	0.271605	0.164835	0.258427	0.229885	0.346667	0.258824	0.188235	0.157303	0.224719	0.244186	0.153846
Z4921678800	0.180851	0.125	0.172414	0.0952381	0.157895	0.163265	0.10989	0.190476	0.108911	0.150538	0.166667	0.0410959	0.0632911	0.170213	0.232877	0.161905	0.175258	0.17	0.188235	0.191919	0.172414	0.164835	0.185185	0.144444	0.2	0.152941	0.230769	0.176471	0.152174	0.125	0.204545	0.183908	0.204819	0.209877	0.192771	0.219512	0.225	0.190476	0.214286	0.117021	0.206522	0.218391	0.282051	0.204545	0.176471	0.120879	0.186813	0.191011	0.142857
Z4921675943	0.145631	0.15	0.184783	0.0879121	0.206186	0.141509	0.148936	0.189189	0.122642	0.1875	0.135135	0.0779221	0.109756	0.147059	0.197531	0.141593	0.152381	0.148148	0.148936	0.136364	0.123711	0.118812	0.119565	0.122449	0.105769	0.141304	0.197674	0.175824	0.13	0.152174	0.177083	0.170213	0.215909	0.166667	0.204545	0.229885	0.179775	0.202247	0.184783	0.142857	0.191919	0.189474	0.175824	0.189474	0.202247	0.172043	0.185567	0.189474	0.261364
Z4921676401	0.175258	0.14433	0.153846	0.117647	0.153061	0.21875	0.142857	0.153153	0.0952381	0.145833	0.173077	0.0821918	0.0481928	0.153061	0.207792	0.136364	0.147059	0.176471	0.181818	0.141509	0.235294	0.224719	0.269231	0.177778	0.206522	0.294872	0.207317	0.157303	0.224719	0.186047	0.172043	0.152174	0.183908	0.231707	0.172414	0.170455	0.188235	0.183908	0.179775	0.16129	0.1875	0.159574	0.240964	0.197802	0.170455	0.166667	0.168421	0.184783	0.138298
Z4921663506	0.148515	0.13	0.175824	0.154762	0.161616	0.214286	0.139785	0.160714	0.147059	0.142857	0.107143	0.0519481	0.1125	0.105769	0.158537	0.104348	0.101852	0.119266	0.12766	0.108108	0.229885	0.206522	0.216867	0.2	0.189474	0.211765	0.147727	0.129032	0.21978	0.253012	0.180851	0.113402	0.166667	0.157303	0.130435	0.206897	0.119565	0.129032	0.150538	0.235955	0.148515	0.14433	0.193182	0.14433	0.129032	0.27381	0.189474	0.206522	0.123711
Z4927220948	0.180851	0.186813	0.133333	0.108434	0.170213	0.151515	0.174419	0.179245	0.131313	0.163043	0.214286	0.0410959	0.0769231	0.195652	0.184211	0.184466	0.175258	0.193878	0.134831	0.18	0.172414	0.164835	0.2	0.170455	0.186813	0.152941	0.2	0.204819	0.164835	0.151163	0.177778	0.144444	0.176471	0.209877	0.164706	0.190476	0.195122	0.162791	0.186047	0.179775	0.168421	0.139785	0.190476	0.177778	0.149425	0.172414	0.173913	0.164835	0.142857
Z4927220963	0.14433	0.16129	0.146067	0.135802	0.170213	0.225806	0.174419	0.168224	0.108911	0.138298	0.15534	0.0857143	0.0909091	0.145833	0.153846	0.140187	0.128713	0.147059	0.16092	0.134615	0.214286	0.191011	0.230769	0.183908	0.186813	0.361111	0.142857	0.111111	0.218391	0.192771	0.139785	0.144444	0.136364	0.152941	0.125	0.149425	0.126437	0.136364	0.133333	0.193182	0.132653	0.115789	0.176471	0.164835	0.162791	0.2	0.136842	0.152174	0.142857
Z4921673621	0.178218	0.104762	0.157895	0.0989011	0.191919	0.150943	0.10101	0.242991	0.121495	0.210526	0.154545	0.105263	0.0823529	0.168317	0.139535	0.160714	0.173077	0.190476	0.123711	0.166667	0.145833	0.14	0.130435	0.121212	0.126214	0.191011	0.142857	0.173913	0.14	0.138298	0.163265	0.15625	0.148936	0.12766	0.175824	0.16129	0.164835	0.16129	0.157895	0.141414	0.144231	0.128713	0.16129	0.14	0.16129	0.170213	0.16	0.2	0.142857
Z4927220229	0.173077	0.11215	0.164948	0.0957447	0.19802	0.146789	0.108911	0.247706	0.118182	0.204082	0.160714	0.0875	0.0795455	0.163462	0.147727	0.176991	0.179245	0.196262	0.12	0.183486	0.153061	0.147059	0.138298	0.128713	0.133333	0.159574	0.150538	0.168421	0.147059	0.145833	0.17	0.151515	0.15625	0.135417	0.170213	0.168421	0.172043	0.168421	0.164948	0.148515	0.140187	0.147059	0.168421	0.147059	0.168421	0.177083	0.166667	0.206186	0.15
Z4921673722	0.178218	0.0841121	0.145833	0.0989011	0.18	0.150943	0.09	0.220183	0.142857	0.25	0.154545	0.0909091	0.0823529	0.156863	0.139535	0.160714	0.161905	0.168224	0.135417	0.155963	0.134021	0.128713	0.130435	0.11	0.104762	0.139785	0.142857	0.186813	0.151515	0.188889	0.151515	0.14433	0.125	0.139785	0.188889	0.2	0.164835	0.16129	0.134021	0.177083	0.11215	0.14	0.173913	0.151515	0.2	0.170213	0.137255	0.1875	0.191489
Z4927220507	0.21	0.134615	0.166667	0.108696	0.212121	0.158879	0.121212	0.261682	0.161905	0.258065	0.216981	0.075	0.0804598	0.176471	0.149425	0.168142	0.203883	0.209524	0.14433	0.174312	0.142857	0.148515	0.152174	0.118812	0.12381	0.16129	0.204545	0.208791	0.171717	0.184783	0.16	0.202128	0.182796	0.2	0.252874	0.208791	0.227273	0.222222	0.154639	0.173469	0.141509	0.148515	0.170213	0.171717	0.264368	0.154639	0.145631	0.195876	0.23913
Z4921664109	0.0776699	0.125	0.108696	0.0697674	0.145833	0.117647	0.122222	0.157407	0.12	0.114583	0.101852	0.0410959	0.135135	0.1	0.097561	0.109091	0.0961538	0.103774	0.0744681	0.113208	0.120879	0.115789	0.0909091	0.107527	0.102041	0.126437	0.103448	0.111111	0.12766	0.164706	0.115789	0.107527	0.111111	0.126437	0.1	0.149425	0.101124	0.0869565	0.120879	0.166667	0.11	0.0927835	0.123596	0.115789	0.123596	0.159091	0.125	0.104167	0.155556
Z4921673990	0.100917	0.114286	0.168421	0.0744681	0.214286	0.205882	0.0891089	0.175439	0.110092	0.148515	0.103448	0.0759494	0.0813953	0.133333	0.137931	0.12931	0.0982143	0.166667	0.1	0.114035	0.15625	0.138614	0.179775	0.12	0.135922	0.138298	0.141304	0.112245	0.138614	0.16129	0.173469	0.154639	0.123711	0.138298	0.136842	0.147368	0.150538	0.147368	0.132653	0.151515	0.121495	0.105769	0.123711	0.161616	0.172043	0.168421	0.158416	0.223404	0.164948
Z4927214646	0.102804	0.105769	0.123711	0.0879121	0.147059	0.141509	0.102041	0.128205	0.122642	0.128713	0.105263	0.0506329	0.0705882	0.103774	0.114943	0.0932203	0.1	0.127273	0.102041	0.0964912	0.112245	0.107843	0.131868	0.1	0.105769	0.141304	0.119565	0.103093	0.118812	0.115789	0.141414	0.122449	0.103093	0.117021	0.115789	0.126316	0.117021	0.114583	0.112245	0.108911	0.102804	0.0970874	0.114583	0.13	0.126316	0.135417	0.127451	0.164948	0.132653
Z4927215025	0.121495	0.114286	0.11	0.10989	0.144231	0.171429	0.122449	0.145299	0.130841	0.115385	0.142857	0.103896	0.0941176	0.122642	0.11236	0.119658	0.138889	0.135135	0.145833	0.114035	0.180851	0.161616	0.179775	0.142857	0.135922	0.175824	0.105263	0.112245	0.185567	0.16129	0.15	0.12	0.112245	0.103093	0.113402	0.147368	0.103093	0.112245	0.11	0.163265	0.121495	0.105769	0.159574	0.127451	0.112245	0.193548	0.158416	0.15	0.107843
Z4927219874	0.215054	0.111111	0.130435	0.105882	0.178947	0.221053	0.131868	0.154545	0.117647	0.159574	0.186275	0.0833333	0.0617284	0.166667	0.179487	0.158879	0.183673	0.19	0.211765	0.165049	0.209302	0.2	0.225	0.166667	0.222222	0.190476	0.166667	0.172414	0.2	0.16092	0.16129	0.141304	0.146067	0.176471	0.16092	0.159091	0.176471	0.186047	0.142857	0.175824	0.164948	0.136842	0.214286	0.16129	0.159091	0.155556	0.145833	0.2	0.139785
Z4927220112	0.122642	0.0943396	0.134021	0.0989011	0.156863	0.161905	0.10101	0.176991	0.121495	0.185567	0.114035	0.0632911	0.0823529	0.102804	0.126437	0.111111	0.0990991	0.126126	0.135417	0.115044	0.145833	0.14	0.155556	0.0990099	0.115385	0.204545	0.11828	0.113402	0.14	0.163043	0.14	0.121212	0.113402	0.115789	0.114583	0.16129	0.115789	0.125	0.111111	0.141414	0.101852	0.106796	0.16129	0.117647	0.148936	0.145833	0.126214	0.175258	0.154639
Z4927221743	0.0957447	0.111111	0.119048	0.0909091	0.186047	0.218391	0.107143	0.17	0.155556	0.151163	0.121212	0.0967742	0.101449	0.120879	0.0933333	0.117647	0.104167	0.135417	0.0941176	0.111111	0.205128	0.195122	0.205479	0.158537	0.176471	0.323529	0.1	0.0952381	0.209877	0.197368	0.126437	0.104651	0.0952381	0.097561	0.109756	0.135802	0.097561	0.121951	0.105882	0.182927	0.0957447	0.0769231	0.121951	0.101124	0.135802	0.220779	0.136364	0.139535	0.129412
Z4921675184	0.0618557	0.123596	0.0930233	0.0909091	0.108696	0.115789	0.134146	0.114286	0.106383	0.137931	0.0673077	0.0461538	0.0857143	0.0736842	0.108108	0.0654206	0.0707071	0.0686275	0.134146	0.0679612	0.105882	0.0888889	0.113924	0.104651	0.0869565	0.111111	0.1	0.0823529	0.101124	0.123457	0.113636	0.104651	0.0952381	0.097561	0.0833333	0.135802	0.097561	0.0823529	0.0930233	0.127907	0.0729167	0.0888889	0.0952381	0.113636	0.121951	0.175	0.111111	0.113636	0.185185
Z4921675191	0.0679612	0.0918367	0.122222	0.109756	0.159574	0.164948	0.0989011	0.127273	0.11	0.12766	0.0630631	0.0714286	0.106667	0.0686275	0.0987654	0.0707965	0.0761905	0.0740741	0.0869565	0.0733945	0.134831	0.129032	0.117647	0.120879	0.103093	0.141176	0.0795455	0.076087	0.129032	0.195122	0.129032	0.0967742	0.076087	0.0898876	0.0888889	0.151163	0.0777778	0.0879121	0.0978261	0.168539	0.0784314	0.0824742	0.11236	0.117021	0.11236	0.188235	0.126316	0.129032	0.183908
Z4921675198	0.116505	0.131313	0.139785	0.103448	0.14	0.168317	0.129032	0.151786	0.104762	0.14433	0.118182	0.111111	0.0864198	0.117647	0.119048	0.125	0.12381	0.130841	0.09375	0.140187	0.177778	0.157895	0.162791	0.163043	0.166667	0.172414	0.123596	0.11828	0.157895	0.22619	0.122449	0.126316	0.11828	0.120879	0.170455	0.168539	0.133333	0.181818	0.12766	0.224719	0.105769	0.122449	0.130435	0.122449	0.130435	0.204545	0.154639	0.145833	0.16129
Z4921678629	0.282353	0.139785	0.149425	0.097561	0.2	0.142857	0.137931	0.255102	0.134021	0.206897	0.3	0.0571429	0.0649351	0.270588	0.205479	0.263158	0.287356	0.292135	0.164706	0.288889	0.162791	0.155556	0.175	0.134831	0.177778	0.185185	0.205128	0.225	0.168539	0.102273	0.181818	0.16092	0.195122	0.2	0.2125	0.195122	0.21519	0.195122	0.204819	0.119565	0.197802	0.181818	0.225	0.181818	0.180723	0.111111	0.177778	0.195402	0.159091
Z4921678640	0.247312	0.107843	0.163043	0.0898876	0.210526	0.20202	0.104167	0.203704	0.147059	0.230769	0.215686	0.0657895	0.0595238	0.223404	0.1875	0.198113	0.226804	0.244898	0.152174	0.23	0.175824	0.168421	0.188235	0.148936	0.177083	0.170455	0.188235	0.179775	0.168421	0.142857	0.233333	0.186813	0.166667	0.183908	0.195402	0.179775	0.197674	0.193182	0.175824	0.134021	0.183673	0.15625	0.193182	0.206522	0.235294	0.150538	0.189474	0.275862	0.172043
Z4921678664	0.21978	0.136842	0.146067	0.108434	0.264368	0.163265	0.122222	0.237624	0.131313	0.188889	0.20202	0.0704225	0.0769231	0.208791	0.2	0.22	0.225806	0.231579	0.174419	0.229167	0.172414	0.164835	0.170732	0.157303	0.2	0.166667	0.21519	0.219512	0.191011	0.125	0.218391	0.197674	0.204819	0.209877	0.207317	0.204819	0.240506	0.190476	0.214286	0.117021	0.193548	0.177778	0.25	0.247059	0.219512	0.133333	0.2	0.191011	0.181818
Z4927218341	0.188119	0.125	0.168421	0.0860215	0.20202	0.217822	0.122449	0.165217	0.141509	0.183673	0.196262	0.0759494	0.0568182	0.178218	0.192771	0.159292	0.182692	0.188679	0.170213	0.186916	0.180851	0.210526	0.193182	0.142857	0.21875	0.188889	0.193182	0.172043	0.161616	0.16129	0.25	0.178947	0.172043	0.175824	0.186813	0.184783	0.188889	0.172043	0.193548	0.14	0.188119	0.173469	0.224719	0.210526	0.211111	0.132653	0.206186	0.263736	0.177083
Z4927221425	0.173469	0.154639	0.152174	0.0909091	0.2	0.134615	0.141304	0.216981	0.137255	0.168421	0.171429	0.038961	0.0864198	0.163265	0.205128	0.17757	0.216495	0.222222	0.141304	0.196078	0.139785	0.134021	0.149425	0.126316	0.154639	0.146067	0.204819	0.195402	0.182796	0.119565	0.170213	0.188889	0.181818	0.214286	0.183908	0.209302	0.2	0.181818	0.204545	0.123711	0.210526	0.182796	0.181818	0.195652	0.195402	0.12766	0.178947	0.157895	0.173913
Z4921678687	0.25	0.120879	0.21519	0.102564	0.181818	0.186813	0.117647	0.214286	0.104167	0.202381	0.228261	0.0606061	0.0833333	0.238095	0.3125	0.221053	0.241379	0.233333	0.202532	0.244444	0.2	0.176471	0.216216	0.168675	0.214286	0.194805	0.304348	0.205128	0.162791	0.148148	0.265823	0.182927	0.27027	0.260274	0.256757	0.287671	0.277778	0.253333	0.28	0.151163	0.26506	0.25	0.382353	0.265823	0.205128	0.142857	0.243902	0.282051	0.166667
Z4921678719	0.195652	0.114583	0.231707	0.109756	0.184783	0.202128	0.111111	0.180952	0.14433	0.177778	0.18	0.0416667	0.0921053	0.184783	0.289855	0.174757	0.177083	0.171717	0.190476	0.181818	0.188235	0.166667	0.202532	0.159091	0.188889	0.154762	0.283784	0.192771	0.153846	0.152941	0.3125	0.186047	0.253165	0.24359	0.209877	0.285714	0.24359	0.207317	0.2625	0.155556	0.25	0.235294	0.356164	0.280488	0.192771	0.16092	0.304878	0.280488	0.157303
Z4921678766	0.178218	0.126214	0.134021	0.0869565	0.18	0.196078	0.123711	0.166667	0.142857	0.185567	0.154545	0.105263	0.0574713	0.168317	0.152941	0.150442	0.173077	0.179245	0.147368	0.166667	0.182796	0.175258	0.168539	0.15625	0.183673	0.204545	0.155556	0.148936	0.163265	0.126316	0.2	0.14433	0.136842	0.191011	0.175824	0.148936	0.164835	0.16129	0.145833	0.118812	0.15534	0.14	0.186813	0.1875	0.173913	0.145833	0.16	0.225806	0.142857
Z4921678775	0.21978	0.113402	0.133333	0.164557	0.157895	0.175258	0.122222	0.179245	0.108911	0.150538	0.166667	0.0555556	0.05	0.182796	0.2	0.173077	0.163265	0.181818	0.174419	0.168317	0.186047	0.177778	0.21519	0.157303	0.2	0.166667	0.185185	0.162791	0.164835	0.137931	0.177778	0.144444	0.162791	0.195122	0.164706	0.162791	0.180723	0.149425	0.172414	0.129032	0.180851	0.164835	0.204819	0.177778	0.149425	0.133333	0.16129	0.164835	0.130435
Z4921678782	0.202128	0.111111	0.11828	0.105882	0.178947	0.183673	0.107527	0.175926	0.0961538	0.147368	0.186275	0.0833333	0.0617284	0.178947	0.179487	0.180952	0.195876	0.214286	0.197674	0.2	0.195402	0.186813	0.180723	0.166667	0.208791	0.219512	0.180723	0.172414	0.186813	0.122222	0.16129	0.141304	0.159091	0.190476	0.202381	0.159091	0.190476	0.186047	0.181818	0.114583	0.177083	0.148936	0.228916	0.16129	0.159091	0.130435	0.145833	0.2	0.12766
Z4921675214	0.197917	0.131313	0.139785	0.103448	0.212766	0.204082	0.129032	0.194444	0.0943396	0.180851	0.182692	0.0958904	0.047619	0.1875	0.189873	0.17757	0.191919	0.19802	0.166667	0.207921	0.191011	0.182796	0.190476	0.163043	0.191489	0.228916	0.190476	0.195402	0.182796	0.144444	0.170213	0.150538	0.168539	0.186047	0.197674	0.168539	0.2	0.195402	0.177778	0.123711	0.173469	0.157895	0.209302	0.170213	0.168539	0.12766	0.166667	0.195652	0.136842
Z4921678788	0.230769	0.135417	0.144444	0.148148	0.15625	0.161616	0.146067	0.2	0.118812	0.148936	0.212121	0.0694444	0.0759494	0.180851	0.197368	0.171429	0.173469	0.191919	0.172414	0.178218	0.170455	0.163043	0.197531	0.155556	0.197802	0.192771	0.182927	0.16092	0.163043	0.136364	0.175824	0.142857	0.16092	0.192771	0.162791	0.174419	0.178571	0.147727	0.170455	0.12766	0.178947	0.163043	0.202381	0.175824	0.16092	0.131868	0.159574	0.175824	0.141304
Z4927221457	0.191489	0.135417	0.170455	0.0941176	0.168421	0.173469	0.120879	0.166667	0.0970874	0.148936	0.188119	0.0694444	0.0493827	0.168421	0.197368	0.160377	0.197917	0.216495	0.172414	0.19	0.170455	0.163043	0.168675	0.142857	0.184783	0.2375	0.2125	0.174419	0.175824	0.123596	0.175824	0.168539	0.188235	0.222222	0.190476	0.174419	0.192771	0.188235	0.183908	0.12766	0.204301	0.163043	0.216867	0.175824	0.188235	0.107527	0.159574	0.175824	0.166667
Z4921675234	0.19	0.115385	0.157895	0.111111	0.216495	0.196078	0.10101	0.1875	0.100917	0.173469	0.165138	0.0769231	0.0697674	0.18	0.180723	0.171171	0.173077	0.179245	0.159574	0.188679	0.157895	0.151515	0.168539	0.132653	0.171717	0.177778	0.195402	0.173913	0.151515	0.126316	0.1875	0.180851	0.173913	0.191011	0.175824	0.173913	0.191011	0.16129	0.182796	0.118812	0.178218	0.151515	0.186813	0.212766	0.186813	0.122449	0.183673	0.1875	0.154639
Z4927221668	0.202128	0.170213	0.130435	0.0930233	0.204301	0.208333	0.144444	0.186916	0.128713	0.172043	0.222222	0.0985915	0.075	0.178947	0.164557	0.192308	0.221053	0.20202	0.157303	0.212121	0.223529	0.241379	0.195122	0.179775	0.25	0.234568	0.195122	0.186047	0.213483	0.134831	0.186813	0.153846	0.2	0.234568	0.202381	0.159091	0.204819	0.186047	0.209302	0.114583	0.202128	0.16129	0.228916	0.173913	0.159091	0.130435	0.182796	0.186813	0.12766
Z4921678833	0.216495	0.105769	0.159574	0.11236	0.206186	0.19802	0.102041	0.189189	0.133333	0.175258	0.2	0.0641026	0.0581395	0.206186	0.197531	0.194444	0.186275	0.203883	0.16129	0.190476	0.184783	0.177083	0.197674	0.157895	0.197917	0.179775	0.197674	0.175824	0.164948	0.152174	0.215054	0.195652	0.175824	0.179775	0.204545	0.188889	0.206897	0.188889	0.184783	0.142857	0.18	0.164948	0.229885	0.215054	0.215909	0.159574	0.197917	0.228261	0.180851
Z4927221391	0.20202	0.126214	0.134021	0.111111	0.18	0.173077	0.123711	0.176991	0.132075	0.15	0.165138	0.0909091	0.0697674	0.168317	0.152941	0.160714	0.184466	0.190476	0.159574	0.188679	0.182796	0.175258	0.168539	0.15625	0.183673	0.204545	0.168539	0.173913	0.1875	0.126316	0.175258	0.15625	0.148936	0.164835	0.175824	0.186813	0.164835	0.148936	0.170213	0.118812	0.15534	0.151515	0.186813	0.175258	0.186813	0.134021	0.16	0.1875	0.131313
Z4921679142	0.188119	0.114286	0.168421	0.0978261	0.214286	0.217822	0.111111	0.196429	0.130841	0.171717	0.185185	0.0897436	0.0813953	0.19	0.207317	0.190909	0.182692	0.2	0.157895	0.198113	0.233333	0.223404	0.25	0.191489	0.231579	0.215909	0.22093	0.197802	0.185567	0.173913	0.210526	0.191489	0.197802	0.215909	0.2	0.238636	0.229885	0.197802	0.233333	0.163265	0.212121	0.185567	0.267442	0.223404	0.197802	0.180851	0.21875	0.236559	0.141414
Z4921679153	0.171717	0.107843	0.163043	0.102273	0.173469	0.214286	0.104167	0.171171	0.114286	0.166667	0.158879	0.08	0.0853659	0.161616	0.217949	0.154545	0.178218	0.184466	0.177778	0.171429	0.215909	0.206522	0.231707	0.173913	0.228261	0.197674	0.216867	0.179775	0.168421	0.168539	0.206522	0.186813	0.193182	0.211765	0.195402	0.22093	0.211765	0.179775	0.215909	0.157895	0.195876	0.180851	0.26506	0.21978	0.193182	0.163043	0.215054	0.206522	0.159574
Z4921758507	0.0740741	0.0865385	0.126316	0.0659341	0.127451	0.144231	0.0816327	0.092437	0.103774	0.108911	0.0877193	0.08	0.0853659	0.0849057	0.104651	0.0948276	0.101852	0.0892857	0.0927835	0.0982143	0.126316	0.132653	0.10989	0.102041	0.118812	0.0957447	0.0978261	0.0824742	0.11	0.181818	0.11	0.102041	0.09375	0.0842105	0.11828	0.141304	0.0957447	0.105263	0.103093	0.157895	0.104762	0.11	0.141304	0.0990099	0.129032	0.163043	0.118812	0.121212	0.147368
Z4921675282	0.226804	0.126214	0.145833	0.149425	0.168317	0.161905	0.135417	0.209091	0.142857	0.138614	0.154545	0.12	0.0952381	0.134615	0.126437	0.130435	0.150943	0.157407	0.147368	0.155963	0.157895	0.151515	0.155556	0.132653	0.171717	0.177778	0.130435	0.136842	0.163265	0.175824	0.163265	0.121212	0.125	0.12766	0.138298	0.173913	0.12766	0.136842	0.134021	0.164948	0.133333	0.128713	0.136842	0.128713	0.125	0.195652	0.148515	0.2	0.131313
Z4921675306	0.195652	0.138298	0.174419	0.0963855	0.224719	0.13	0.149425	0.192308	0.15625	0.218391	0.191919	0.0714286	0.136986	0.184783	0.171053	0.163462	0.202128	0.195876	0.136364	0.181818	0.122222	0.117021	0.117647	0.120879	0.114583	0.127907	0.202532	0.192771	0.117021	0.166667	0.179775	0.172414	0.192771	0.168675	0.195122	0.2375	0.2125	0.207317	0.174419	0.155556	0.145833	0.179775	0.151163	0.179775	0.192771	0.188235	0.175824	0.206897	0.240964
Z4927220566	0.0849057	0.108911	0.139785	0.103448	0.163265	0.168317	0.117021	0.141593	0.104762	0.132653	0.0982143	0.0810811	0.1	0.106796	0.119048	0.0956522	0.102804	0.12037	0.09375	0.0892857	0.139785	0.134021	0.136364	0.150538	0.108911	0.133333	0.136364	0.11828	0.145833	0.197674	0.182796	0.138298	0.11828	0.120879	0.131868	0.181818	0.133333	0.11828	0.12766	0.172043	0.105769	0.111111	0.11828	0.170213	0.168539	0.191011	0.166667	0.157895	0.16129
Z4927215001	0.168317	0.138614	0.159574	0.11236	0.21875	0.152381	0.136842	0.2	0.166667	0.163265	0.155963	0.0506329	0.0963855	0.147059	0.197531	0.151786	0.152381	0.158879	0.173913	0.146789	0.147368	0.141414	0.144444	0.134021	0.138614	0.153846	0.197674	0.175824	0.164948	0.12766	0.189474	0.208791	0.188889	0.179775	0.177778	0.202247	0.179775	0.175824	0.184783	0.12	0.18	0.177083	0.188889	0.215054	0.229885	0.147368	0.210526	0.177083	0.233333
Z4921675343	0.148515	0.118812	0.188889	0.114943	0.223404	0.252632	0.115789	0.203704	0.114286	0.178947	0.148148	0.0657895	0.0722892	0.138614	0.202532	0.133929	0.15534	0.184466	0.204545	0.138889	0.229885	0.206522	0.231707	0.173913	0.202128	0.170455	0.202381	0.206897	0.21978	0.209302	0.193548	0.173913	0.206897	0.183908	0.181818	0.22093	0.22619	0.179775	0.175824	0.208791	0.171717	0.180851	0.25	0.206522	0.179775	0.202247	0.189474	0.21978	0.147368
Z4921675344	0.118812	0.145833	0.155556	0.13253	0.191489	0.221053	0.144444	0.154545	0.128713	0.197802	0.12037	0.0540541	0.075	0.12	0.164557	0.127273	0.115385	0.144231	0.170455	0.132075	0.181818	0.173913	0.195122	0.153846	0.170213	0.234568	0.166667	0.120879	0.186813	0.174419	0.173913	0.153846	0.172414	0.149425	0.134831	0.172414	0.149425	0.159091	0.155556	0.150538	0.13	0.125	0.159091	0.173913	0.186047	0.168539	0.157895	0.2	0.164835
Z4921675347	0.126214	0.141414	0.150538	0.127907	0.185567	0.214286	0.139785	0.181818	0.125	0.166667	0.127273	0.0519481	0.0722892	0.15	0.144578	0.154545	0.122642	0.150943	0.177778	0.12844	0.202247	0.193548	0.188235	0.16129	0.177083	0.256098	0.147727	0.117021	0.21978	0.181818	0.15625	0.16129	0.153846	0.144444	0.130435	0.153846	0.131868	0.141304	0.138298	0.157895	0.137255	0.121212	0.179775	0.180851	0.206897	0.188889	0.153061	0.168421	0.197802
Z4921679205	0.128713	0.168421	0.141304	0.104651	0.164948	0.231579	0.168539	0.142857	0.116505	0.145833	0.12963	0.0533333	0.0875	0.118812	0.1625	0.116071	0.158416	0.165049	0.223529	0.12037	0.235294	0.211111	0.222222	0.191011	0.206522	0.174419	0.164706	0.157303	0.238636	0.2	0.147368	0.164835	0.183908	0.174419	0.133333	0.183908	0.147727	0.144444	0.153846	0.2	0.151515	0.159574	0.22619	0.172043	0.170455	0.22093	0.15625	0.172043	0.138298
Z4921679213	0.135922	0.14	0.136842	0.101124	0.183673	0.237113	0.138298	0.169643	0.12381	0.141414	0.136364	0.0512821	0.0843373	0.137255	0.156627	0.153153	0.165049	0.182692	0.215909	0.137615	0.227273	0.204301	0.214286	0.172043	0.1875	0.168539	0.159091	0.164835	0.258427	0.193182	0.154639	0.159574	0.177778	0.155556	0.129032	0.177778	0.142857	0.139785	0.148936	0.193548	0.147059	0.142857	0.218391	0.166667	0.177778	0.2	0.163265	0.166667	0.145833
Z4921679227	0.115385	0.177083	0.138298	0.0898876	0.15	0.239583	0.177778	0.140351	0.103774	0.142857	0.117117	0.0519481	0.0853659	0.105769	0.158537	0.104348	0.133333	0.150943	0.218391	0.108108	0.229885	0.206522	0.216867	0.173913	0.189474	0.183908	0.16092	0.141304	0.233333	0.195402	0.15625	0.16129	0.166667	0.170455	0.130435	0.166667	0.144444	0.141304	0.138298	0.195652	0.137255	0.132653	0.22093	0.168421	0.166667	0.202247	0.153061	0.180851	0.135417
Z4927221613	0.12381	0.15	0.147368	0.1	0.193878	0.234694	0.136842	0.178571	0.122642	0.151515	0.155963	0.0506329	0.0833333	0.125	0.154762	0.151786	0.163462	0.192308	0.227273	0.157407	0.224719	0.228261	0.240964	0.182796	0.223404	0.166667	0.170455	0.163043	0.255556	0.232558	0.164948	0.170213	0.188889	0.166667	0.139785	0.175824	0.153846	0.150538	0.159574	0.217391	0.156863	0.153061	0.202247	0.177083	0.188889	0.211111	0.161616	0.177083	0.15625
Z4927221611	0.138614	0.142857	0.139785	0.0909091	0.1875	0.242105	0.141304	0.162162	0.126214	0.15625	0.138889	0.0526316	0.1	0.128713	0.175	0.125	0.168317	0.186275	0.25	0.12963	0.232558	0.208791	0.234568	0.175824	0.191489	0.172414	0.176471	0.181818	0.235955	0.211765	0.145833	0.175824	0.195402	0.186047	0.144444	0.181818	0.159091	0.155556	0.177778	0.197802	0.161616	0.195652	0.223529	0.170213	0.181818	0.204545	0.154639	0.170213	0.148936
Z4927220008	0.130841	0.156863	0.154639	0.146067	0.165049	0.227723	0.15625	0.184211	0.140187	0.147059	0.131579	0.0617284	0.119048	0.121495	0.149425	0.118644	0.117117	0.133929	0.15625	0.113043	0.258427	0.26087	0.247059	0.241758	0.216495	0.2	0.152174	0.122449	0.234043	0.238636	0.171717	0.141414	0.170213	0.148936	0.123711	0.208791	0.136842	0.122449	0.166667	0.223404	0.141509	0.148515	0.208791	0.183673	0.145833	0.244444	0.18	0.183673	0.14
Z4927221638	0.121495	0.158416	0.168421	0.10989	0.178218	0.242424	0.145833	0.165217	0.12037	0.183673	0.153153	0.103896	0.0941176	0.122642	0.151163	0.119658	0.138889	0.145455	0.208791	0.123894	0.261364	0.263736	0.26506	0.230769	0.231579	0.229885	0.166667	0.147368	0.25	0.255814	0.173469	0.166667	0.172043	0.175824	0.148936	0.184783	0.150538	0.159574	0.168421	0.252747	0.153846	0.138614	0.211111	0.185567	0.184783	0.233333	0.17	0.173469	0.164948
Z4921665433	0.103774	0.117647	0.125	0.113636	0.148515	0.176471	0.114583	0.119658	0.102804	0.118812	0.106195	0.0649351	0.0843373	0.115385	0.129412	0.0940171	0.0909091	0.118182	0.126316	0.0973451	0.173913	0.166667	0.172414	0.135417	0.175258	0.142857	0.133333	0.12766	0.166667	0.179775	0.154639	0.147368	0.12766	0.142857	0.129032	0.152174	0.155556	0.104167	0.136842	0.14433	0.125	0.0980392	0.164835	0.154639	0.139785	0.173913	0.175258	0.178947	0.122449
Z4921675784	0.193878	0.117647	0.148936	0.0769231	0.171717	0.100917	0.126316	0.18018	0.134615	0.215054	0.201923	0.0649351	0.097561	0.171717	0.170732	0.153153	0.188119	0.171429	0.126316	0.158879	0.08	0.0980392	0.108696	0.09	0.106796	0.0947368	0.172414	0.177778	0.0873786	0.153846	0.166667	0.159574	0.177778	0.155556	0.179775	0.191011	0.181818	0.191011	0.136842	0.132653	0.147059	0.154639	0.12766	0.154639	0.177778	0.136842	0.14	0.166667	0.25
Z4921675874	0.10101	0.115789	0.162791	0.139241	0.16129	0.166667	0.1	0.182692	0.134021	0.179775	0.135922	0.0571429	0.108108	0.113402	0.113924	0.121495	0.131313	0.138614	0.11236	0.126214	0.162791	0.155556	0.175	0.16092	0.139785	0.142857	0.119048	0.101124	0.195402	0.227848	0.142857	0.10989	0.139535	0.116279	0.102273	0.166667	0.103448	0.101124	0.111111	0.22619	0.147368	0.0947368	0.126437	0.11828	0.139535	0.25	0.139785	0.155556	0.172414
Z4927217083	0.116505	0.131313	0.164835	0.0666667	0.1875	0.12381	0.129032	0.172727	0.115385	0.193548	0.138889	0.0666667	0.1	0.128713	0.175	0.125	0.145631	0.141509	0.153846	0.12963	0.115789	0.111111	0.111111	0.114583	0.0980392	0.120879	0.176471	0.155556	0.122449	0.157303	0.170213	0.163043	0.195402	0.146067	0.197674	0.209302	0.172414	0.195402	0.164835	0.147368	0.161616	0.170213	0.168539	0.157895	0.181818	0.177778	0.178947	0.182796	0.241379
Z4921676211	0.12	0.147368	0.183908	0.0689655	0.193548	0.116505	0.146067	0.188679	0.13	0.186813	0.132075	0.0547945	0.118421	0.121212	0.197368	0.118182	0.161616	0.145631	0.133333	0.144231	0.107527	0.103093	0.102273	0.106383	0.09	0.137931	0.197531	0.174419	0.114583	0.136364	0.188889	0.181818	0.216867	0.164706	0.190476	0.231707	0.178571	0.188235	0.183908	0.12766	0.178947	0.202247	0.174419	0.175824	0.216867	0.157303	0.184783	0.175824	0.26506
Z4921676224	0.12	0.123711	0.197674	0.148148	0.168421	0.173469	0.120879	0.166667	0.141414	0.16129	0.121495	0.0547945	0.0897436	0.11	0.181818	0.0982143	0.0849057	0.113208	0.133333	0.0917431	0.157303	0.150538	0.182927	0.142857	0.184783	0.137931	0.182927	0.134831	0.150538	0.219512	0.202247	0.142857	0.174419	0.192771	0.162791	0.231707	0.151163	0.134831	0.157303	0.204545	0.166667	0.138298	0.147727	0.175824	0.174419	0.22619	0.197802	0.202247	0.179775
Z4927214626	0.0891089	0.114583	0.16092	0.0833333	0.159574	0.13	0.111111	0.148148	0.132653	0.191011	0.0925926	0.0714286	0.0921053	0.112245	0.141026	0.0900901	0.0865385	0.115385	0.0989011	0.0934579	0.10989	0.105263	0.144578	0.108696	0.103093	0.141176	0.117647	0.125	0.105263	0.180723	0.153846	0.120879	0.125	0.114943	0.113636	0.164706	0.114943	0.137931	0.10989	0.168539	0.111111	0.105263	0.1	0.141304	0.151163	0.188235	0.138298	0.206897	0.170455
Z4927215645	0.106796	0.121212	0.193182	0.0795455	0.141414	0.135922	0.11828	0.174312	0.127451	0.170213	0.109091	0.0675676	0.0875	0.118812	0.148148	0.106195	0.103774	0.100917	0.142857	0.110092	0.117021	0.112245	0.11236	0.115789	0.0990099	0.134831	0.137931	0.119565	0.112245	0.172414	0.172043	0.115789	0.144444	0.16092	0.172414	0.183908	0.134831	0.183908	0.129032	0.16129	0.128713	0.112245	0.157303	0.147368	0.144444	0.193182	0.14433	0.172043	0.163043
Z4921676728	0.11215	0.115385	0.1	0.0989011	0.168317	0.161905	0.112245	0.146552	0.153846	0.138614	0.144144	0.0769231	0.0952381	0.113208	0.101124	0.101695	0.119266	0.116071	0.112245	0.115044	0.182796	0.175258	0.155556	0.15625	0.137255	0.191011	0.11828	0.113402	0.175258	0.138298	0.14	0.11	0.102041	0.104167	0.126316	0.136842	0.12766	0.136842	0.134021	0.13	0.11215	0.106796	0.148936	0.128713	0.136842	0.157895	0.148515	0.151515	0.131313
Z4927218902	0.12381	0.105769	0.147368	0.076087	0.181818	0.222222	0.102041	0.178571	0.144231	0.163265	0.155963	0.0921053	0.0833333	0.135922	0.141176	0.131579	0.130841	0.137615	0.173913	0.136364	0.211111	0.202128	0.211765	0.145833	0.173469	0.193182	0.144444	0.126316	0.189474	0.152174	0.141414	0.145833	0.138298	0.117021	0.177778	0.150538	0.153846	0.188889	0.147368	0.154639	0.145631	0.118812	0.215909	0.141414	0.188889	0.159574	0.15	0.164948	0.168421
Z4921676768	0.0990099	0.08	0.133333	0.0952381	0.195652	0.23913	0.0860215	0.146789	0.12	0.150538	0.11215	0.0857143	0.0769231	0.1	0.153846	0.0990991	0.106796	0.114286	0.174419	0.102804	0.2	0.191011	0.21519	0.144444	0.173913	0.152941	0.129412	0.111111	0.177778	0.151163	0.12766	0.131868	0.123596	0.101124	0.151163	0.162791	0.126437	0.136364	0.133333	0.141304	0.132653	0.115789	0.204819	0.12766	0.162791	0.146067	0.136842	0.139785	0.142857
Z4921676779	0.113208	0.127451	0.135417	0.1	0.206186	0.222222	0.125	0.211009	0.144231	0.151515	0.145455	0.0779221	0.0963855	0.125	0.141176	0.141593	0.141509	0.148148	0.173913	0.157407	0.224719	0.215054	0.211765	0.157895	0.185567	0.193182	0.144444	0.126316	0.228261	0.152174	0.141414	0.157895	0.150538	0.117021	0.164835	0.163043	0.141304	0.150538	0.159574	0.154639	0.156863	0.153061	0.229885	0.141414	0.202247	0.172043	0.161616	0.153061	0.180851
Z4921676853	0.0784314	0.0594059	0.0860215	0.0963855	0.184783	0.153061	0.0638298	0.107143	0.121212	0.139785	0.0925926	0.0273973	0.0641026	0.0792079	0.1125	0.0803571	0.0970874	0.0943396	0.0869565	0.0733945	0.10989	0.105263	0.130952	0.0967742	0.103093	0.102273	0.091954	0.1	0.117021	0.113636	0.117021	0.0967742	0.0645161	0.0898876	0.0888889	0.125	0.0898876	0.0879121	0.0978261	0.106383	0.0891089	0.0714286	0.0879121	0.117021	0.11236	0.10989	0.103093	0.117021	0.0957447
Z4927220700	0.114286	0.106796	0.125	0.139535	0.171717	0.2	0.103093	0.159292	0.134615	0.141414	0.126126	0.0512821	0.0714286	0.115385	0.142857	0.103448	0.111111	0.138889	0.138298	0.107143	0.186813	0.178947	0.214286	0.159574	0.175258	0.209302	0.133333	0.115789	0.178947	0.166667	0.12	0.147368	0.12766	0.130435	0.129032	0.139785	0.130435	0.139785	0.136842	0.15625	0.125	0.108911	0.12766	0.166667	0.191011	0.186813	0.128713	0.154639	0.182796
Z4927214799	0.104762	0.0865385	0.103093	0.102273	0.223404	0.178218	0.0927835	0.140351	0.135922	0.131313	0.127273	0.08	0.0853659	0.127451	0.117647	0.123894	0.122642	0.12963	0.115789	0.118182	0.138298	0.132653	0.134831	0.125	0.118812	0.131868	0.10989	0.117021	0.14433	0.142857	0.14433	0.113402	0.105263	0.107527	0.11828	0.166667	0.107527	0.117021	0.138298	0.111111	0.137255	0.0990099	0.129032	0.132653	0.129032	0.138298	0.141414	0.14433	0.112245
Z4927221193	0.184466	0.122642	0.13	0.119565	0.174757	0.179245	0.12	0.236364	0.12844	0.191919	0.226415	0.0609756	0.091954	0.19802	0.147727	0.1875	0.201923	0.207547	0.178947	0.183486	0.189474	0.181818	0.175824	0.151515	0.15534	0.197802	0.150538	0.168421	0.181818	0.145833	0.17	0.151515	0.15625	0.135417	0.170213	0.168421	0.172043	0.180851	0.153061	0.148515	0.150943	0.147059	0.193548	0.17	0.168421	0.164948	0.178218	0.181818	0.15
Z4921677000	0.161616	0.12	0.12766	0.116279	0.14	0.156863	0.129032	0.183486	0.148515	0.180851	0.194175	0.038961	0.0864198	0.163265	0.160494	0.145455	0.145631	0.152381	0.166667	0.12963	0.152174	0.157895	0.162791	0.126316	0.154639	0.172414	0.149425	0.142857	0.145833	0.131868	0.195652	0.138298	0.155556	0.133333	0.131868	0.181818	0.133333	0.130435	0.152174	0.147368	0.15	0.157895	0.181818	0.182796	0.155556	0.139785	0.191489	0.157895	0.16129
Z4927220682	0.121495	0.114286	0.11	0.122222	0.15534	0.194175	0.111111	0.175439	0.130841	0.148515	0.163636	0.0759494	0.0813953	0.133333	0.11236	0.119658	0.118182	0.135135	0.134021	0.114035	0.193548	0.185567	0.193182	0.154639	0.158416	0.188889	0.117021	0.123711	0.173469	0.16129	0.138614	0.131313	0.112245	0.138298	0.136842	0.123711	0.126316	0.147368	0.11	0.163265	0.111111	0.0952381	0.147368	0.161616	0.147368	0.193548	0.135922	0.161616	0.13
Z4921677043	0.103774	0.117647	0.102041	0.0888889	0.148515	0.142857	0.114583	0.18018	0.113208	0.141414	0.179245	0.0379747	0.0843373	0.137255	0.116279	0.142857	0.132075	0.138889	0.150538	0.127273	0.16129	0.191489	0.172414	0.112245	0.1875	0.155556	0.108696	0.115789	0.178947	0.129032	0.131313	0.112245	0.115789	0.130435	0.105263	0.12766	0.106383	0.104167	0.125	0.132653	0.114286	0.108911	0.164835	0.142857	0.139785	0.136842	0.14	0.12	0.170213
Z4927215129	0.113208	0.138614	0.147368	0.11236	0.17	0.141509	0.136842	0.147826	0.144231	0.151515	0.125	0.0641026	0.123457	0.135922	0.127907	0.141593	0.12037	0.158879	0.102041	0.126126	0.123711	0.118812	0.119565	0.145833	0.127451	0.141304	0.131868	0.114583	0.141414	0.177778	0.177083	0.122449	0.163043	0.141304	0.115789	0.188889	0.105263	0.114583	0.135417	0.166667	0.12381	0.13	0.126316	0.153061	0.138298	0.184783	0.173469	0.177083	0.14433
Z4927221800	0.108911	0.123711	0.144444	0.148148	0.14433	0.161616	0.120879	0.135135	0.141414	0.125	0.100917	0.0694444	0.103896	0.11	0.109756	0.108108	0.0849057	0.102804	0.108696	0.11215	0.144444	0.138298	0.154762	0.155556	0.135417	0.269231	0.114943	0.0860215	0.150538	0.219512	0.163043	0.11828	0.122222	0.11236	0.0989011	0.16092	0.1	0.10989	0.107527	0.204545	0.0980392	0.103093	0.10989	0.138298	0.134831	0.197674	0.159574	0.150538	0.141304
Z4921677424	0.137255	0.13	0.175824	0.127907	0.15	0.133333	0.12766	0.150442	0.158416	0.166667	0.127273	0.0384615	0.1125	0.138614	0.144578	0.133929	0.122642	0.140187	0.115789	0.12844	0.103093	0.0990099	0.0978261	0.125	0.0970874	0.131868	0.147727	0.117021	0.11	0.168539	0.206522	0.148936	0.153846	0.119565	0.142857	0.193182	0.131868	0.129032	0.138298	0.157895	0.137255	0.132653	0.141304	0.168421	0.179775	0.150538	0.202128	0.193548	0.184783
Z4921668131	0.12381	0.105769	0.147368	0.11236	0.158416	0.174757	0.113402	0.128205	0.133333	0.128713	0.115044	0.0779221	0.0963855	0.114286	0.141176	0.121739	0.110092	0.117117	0.125	0.116071	0.135417	0.141414	0.131868	0.145833	0.127451	0.141304	0.131868	0.103093	0.13	0.232558	0.177083	0.134021	0.138298	0.105263	0.139785	0.188889	0.117021	0.126316	0.123711	0.191489	0.12381	0.13	0.163043	0.153061	0.150538	0.184783	0.173469	0.164948	0.14433
Z4921677511	0.0566038	0.112245	0.119565	0.107143	0.132653	0.185567	0.120879	0.0956522	0.0970874	0.113402	0.0714286	0.0694444	0.103896	0.0776699	0.0963855	0.0695652	0.0747664	0.0925926	0.0736842	0.0720721	0.157303	0.150538	0.154762	0.168539	0.123711	0.151163	0.102273	0.0860215	0.138298	0.204819	0.150538	0.0947368	0.10989	0.1	0.0989011	0.147727	0.1	0.0860215	0.107527	0.177778	0.0873786	0.103093	0.10989	0.114583	0.10989	0.22619	0.123711	0.150538	0.129032
Z4921677517	0.09	0.0927835	0.204819	0.0843373	0.148936	0.178947	0.1	0.12844	0.1	0.166667	0.0833333	0.0882353	0.0933333	0.0909091	0.157895	0.0810811	0.0873786	0.0952381	0.11236	0.0841121	0.162791	0.155556	0.175	0.147727	0.139785	0.156627	0.146341	0.101124	0.11828	0.25974	0.181818	0.122222	0.152941	0.116279	0.114943	0.209877	0.129412	0.126437	0.136364	0.22619	0.135417	0.142857	0.166667	0.142857	0.166667	0.265823	0.152174	0.195402	0.172414
Z4927221008	0.0961538	0.0882353	0.193182	0.104651	0.153061	0.158416	0.0833333	0.132743	0.127451	0.157895	0.109091	0.0821918	0.101266	0.107843	0.134146	0.106195	0.0934579	0.100917	0.11828	0.1	0.129032	0.135417	0.125	0.115789	0.121212	0.122222	0.137931	0.107527	0.112245	0.214286	0.172043	0.139785	0.144444	0.10989	0.159091	0.183908	0.122222	0.131868	0.129032	0.173913	0.14	0.112245	0.157303	0.159574	0.197674	0.206897	0.15625	0.172043	0.188889
Z4927220661	0.134021	0.114583	0.202381	0.109756	0.159574	0.0970874	0.111111	0.158879	0.15625	0.177778	0.134615	0.0416667	0.106667	0.147368	0.155844	0.130841	0.107843	0.126214	0.111111	0.114286	0.0860215	0.0824742	0.0795455	0.0967742	0.0808081	0.102273	0.158537	0.137931	0.0824742	0.166667	0.22093	0.159091	0.192771	0.127907	0.139535	0.222222	0.141176	0.137931	0.16092	0.142857	0.157895	0.166667	0.151163	0.179775	0.192771	0.174419	0.215909	0.193182	0.183908
Z4927216465	0.0740741	0.0970874	0.175824	0.0777778	0.173469	0.144231	0.0927835	0.130435	0.0833333	0.178947	0.0877193	0.08	0.0722892	0.116505	0.117647	0.114035	0.0917431	0.119266	0.104167	0.0982143	0.103093	0.0990099	0.0978261	0.102041	0.0865385	0.131868	0.122222	0.117021	0.0990099	0.168539	0.132653	0.125	0.105263	0.107527	0.11828	0.166667	0.119565	0.129032	0.114583	0.134021	0.126214	0.0882353	0.105263	0.132653	0.153846	0.163043	0.118812	0.15625	0.172043
Z4927219854	0.0952381	0.0980392	0.152174	0.0786517	0.1875	0.18	0.105263	0.121739	0.126214	0.180851	0.108108	0.0810811	0.1	0.117647	0.160494	0.135135	0.12381	0.12037	0.153846	0.140187	0.139785	0.145833	0.136364	0.126316	0.131313	0.120879	0.149425	0.142857	0.122449	0.197674	0.157895	0.150538	0.11828	0.133333	0.183908	0.195402	0.146067	0.155556	0.139785	0.172043	0.138614	0.111111	0.168539	0.145833	0.195402	0.164835	0.154639	0.170213	0.173913
Z4927214905	0.166667	0.16	0.134021	0.0989011	0.18	0.150943	0.159574	0.198198	0.111111	0.197917	0.165138	0.0909091	0.0697674	0.168317	0.166667	0.150442	0.150943	0.168224	0.172043	0.155963	0.157895	0.151515	0.155556	0.132653	0.148515	0.232558	0.155556	0.148936	0.163265	0.138298	0.175258	0.168421	0.148936	0.164835	0.163043	0.173913	0.164835	0.173913	0.145833	0.13	0.133333	0.14	0.173913	0.175258	0.173913	0.170213	0.171717	0.212766	0.204301
Z4921677679	0.0606061	0.0967742	0.116279	0.0886076	0.168539	0.186813	0.091954	0.122642	0.115789	0.122222	0.0865385	0.0606061	0.0985915	0.0947368	0.0769231	0.104762	0.0909091	0.11	0.0795455	0.0980392	0.170732	0.176471	0.153846	0.168675	0.159091	0.179487	0.0843373	0.0804598	0.190476	0.223684	0.123596	0.0898876	0.0930233	0.0823529	0.0813953	0.146341	0.0823529	0.0804598	0.103448	0.192771	0.0824742	0.0752688	0.119048	0.0989011	0.119048	0.230769	0.120879	0.123596	0.139535
Z4921671847	0.0990991	0.11215	0.164948	0.0957447	0.19802	0.201923	0.0980392	0.172414	0.138889	0.168317	0.111111	0.0740741	0.130952	0.12037	0.16092	0.136752	0.146789	0.185185	0.154639	0.141593	0.164948	0.147059	0.163043	0.151515	0.133333	0.147368	0.163043	0.132653	0.158416	0.222222	0.17	0.151515	0.15625	0.172043	0.157895	0.180851	0.147368	0.180851	0.153061	0.221053	0.150943	0.135922	0.180851	0.147059	0.180851	0.202128	0.178218	0.206186	0.173469
Z4927220713	0.0909091	0.114286	0.121212	0.0978261	0.178218	0.171429	0.111111	0.107438	0.130841	0.16	0.103448	0.0897436	0.0689655	0.0917431	0.125	0.0916667	0.0982143	0.105263	0.111111	0.0948276	0.132653	0.127451	0.129032	0.12	0.114286	0.150538	0.129032	0.135417	0.138614	0.16129	0.127451	0.131313	0.09	0.126316	0.125	0.159574	0.138298	0.123711	0.11	0.163265	0.121495	0.0952381	0.112245	0.138614	0.147368	0.168421	0.125	0.161616	0.141414
Z4927221200	0.101852	0.137255	0.122449	0.149425	0.145631	0.173077	0.123711	0.156522	0.111111	0.127451	0.133929	0.05	0.0952381	0.113208	0.101124	0.130435	0.119266	0.126126	0.147368	0.125	0.157895	0.175258	0.181818	0.15625	0.16	0.177778	0.130435	0.113402	0.128713	0.215909	0.163265	0.132653	0.136842	0.115789	0.126316	0.173913	0.12766	0.136842	0.134021	0.177083	0.101852	0.106796	0.125	0.151515	0.148936	0.182796	0.16	0.163265	0.154639
Z4927219557	0.0776699	0.08	0.133333	0.0574713	0.182796	0.128713	0.0860215	0.116071	0.0980392	0.126316	0.101852	0.0555556	0.0769231	0.111111	0.097561	0.109091	0.0961538	0.103774	0.0860215	0.0925926	0.0967742	0.104167	0.0909091	0.107527	0.102041	0.0888889	0.103448	0.111111	0.115789	0.125	0.115789	0.107527	0.111111	0.0888889	0.1	0.162791	0.113636	0.0869565	0.108696	0.105263	0.0882353	0.0927835	0.111111	0.115789	0.111111	0.133333	0.125	0.139785	0.130435
Z4927221099	0.114286	0.128713	0.270588	0.101124	0.171717	0.2	0.126316	0.159292	0.134615	0.177083	0.106195	0.0789474	0.111111	0.115385	0.246753	0.113043	0.100917	0.118182	0.150538	0.117117	0.186813	0.166667	0.2	0.159574	0.163265	0.253012	0.243902	0.139785	0.154639	0.235294	0.272727	0.159574	0.218391	0.209302	0.179775	0.292683	0.195402	0.191011	0.227273	0.233333	0.206186	0.191489	0.292683	0.230769	0.191011	0.227273	0.266667	0.287356	0.195652
Z4927220211	0.148148	0.141509	0.138614	0.129032	0.182692	0.133929	0.128713	0.189655	0.190476	0.121495	0.147826	0.0722892	0.0898876	0.12844	0.131868	0.125	0.114035	0.150442	0.14	0.119658	0.127451	0.122642	0.112245	0.115385	0.110092	0.14433	0.147368	0.13	0.144231	0.154639	0.178218	0.126214	0.141414	0.14433	0.154639	0.177083	0.14433	0.141414	0.138614	0.134615	0.137615	0.166667	0.141414	0.144231	0.141414	0.173469	0.186275	0.20202	0.135922
Z4921677871	0.130841	0.12381	0.108911	0.0851064	0.153846	0.117117	0.121212	0.163793	0.184466	0.114286	0.121739	0.075	0.0930233	0.121495	0.111111	0.118644	0.127273	0.144144	0.132653	0.113043	0.108911	0.104762	0.0927835	0.0970874	0.0925926	0.125	0.104167	0.111111	0.126214	0.135417	0.16	0.0970874	0.1	0.102041	0.112245	0.157895	0.102041	0.111111	0.108911	0.116505	0.1	0.137255	0.122449	0.115385	0.111111	0.154639	0.168317	0.183673	0.106796
Z4921677924	0.0789474	0.121495	0.106796	0.0947368	0.140187	0.155963	0.118812	0.181034	0.117117	0.133333	0.12931	0.0731707	0.0786517	0.0990991	0.0851064	0.0983607	0.0769231	0.121739	0.13	0.092437	0.163265	0.168317	0.16129	0.138614	0.165049	0.170213	0.0909091	0.108911	0.145631	0.14433	0.12381	0.105769	0.0980392	0.0891089	0.0882353	0.131313	0.0891089	0.0873786	0.0961538	0.147059	0.108108	0.0925926	0.12	0.0925926	0.108911	0.175258	0.121495	0.145631	0.137255
Z4921677946	0.148515	0.141414	0.175824	0.102273	0.197917	0.166667	0.139785	0.171171	0.135922	0.178947	0.148148	0.0519481	0.0853659	0.15	0.217949	0.133929	0.133333	0.161905	0.164835	0.12844	0.175824	0.168421	0.16092	0.148936	0.153061	0.144444	0.216867	0.153846	0.14433	0.142857	0.193548	0.213483	0.206897	0.183908	0.181818	0.206897	0.197674	0.193182	0.202247	0.134021	0.195876	0.206522	0.193182	0.233333	0.235294	0.175824	0.202128	0.193548	0.224719
Z4921678004	0.108108	0.142857	0.151515	0.106383	0.140187	0.145455	0.13	0.151261	0.107143	0.15534	0.119658	0.0731707	0.0909091	0.109091	0.120879	0.107438	0.105263	0.121739	0.13	0.12069	0.14	0.134615	0.136842	0.105769	0.132075	0.170213	0.125	0.108911	0.134615	0.15625	0.156863	0.138614	0.108911	0.111111	0.121212	0.142857	0.122449	0.12	0.117647	0.17	0.12844	0.102804	0.131313	0.113208	0.142857	0.175258	0.142857	0.168317	0.137255
Z4927219744	0.0673077	0.113402	0.133333	0.0574713	0.134021	0.128713	0.122222	0.136364	0.108911	0.126316	0.0818182	0.0410959	0.0632911	0.1	0.139241	0.0990991	0.0961538	0.0934579	0.0978261	0.0825688	0.120879	0.104167	0.116279	0.0957447	0.102041	0.101124	0.116279	0.0869565	0.0927835	0.11236	0.12766	0.0842105	0.111111	0.113636	0.076087	0.149425	0.0888889	0.0989011	0.120879	0.105263	0.121212	0.12766	0.123596	0.115789	0.0869565	0.133333	0.125	0.139785	0.0947368
Z4921678116	0.103774	0.128713	0.173913	0.113636	0.148515	0.153846	0.126316	0.169643	0.134615	0.153061	0.136364	0.0789474	0.097561	0.137255	0.129412	0.122807	0.111111	0.12844	0.103093	0.107143	0.148936	0.154639	0.159091	0.147368	0.163265	0.155556	0.120879	0.152174	0.142857	0.193182	0.142857	0.10101	0.139785	0.11828	0.117021	0.164835	0.106383	0.104167	0.125	0.193548	0.147059	0.108911	0.115789	0.131313	0.139785	0.213483	0.14	0.142857	0.182796
Z4921678145	0.115385	0.107843	0.163043	0.141176	0.15	0.166667	0.104167	0.160714	0.147059	0.142857	0.117117	0.0657895	0.1125	0.105769	0.130952	0.104348	0.0917431	0.109091	0.0816327	0.108108	0.175824	0.168421	0.16092	0.16129	0.164948	0.157303	0.122222	0.105263	0.168421	0.209302	0.15625	0.0909091	0.153846	0.131868	0.106383	0.206897	0.107527	0.09375	0.126316	0.208791	0.126214	0.11	0.153846	0.132653	0.117021	0.229885	0.153061	0.15625	0.147368
Z4927216986	0.0882353	0.136842	0.186047	0.121951	0.182796	0.2	0.10989	0.168224	0.12	0.188889	0.0917431	0.0704225	0.135135	0.1	0.125	0.109091	0.106796	0.125	0.0978261	0.113208	0.186047	0.177778	0.170732	0.170455	0.173913	0.152941	0.142857	0.111111	0.191011	0.222222	0.164835	0.119565	0.176471	0.152941	0.125	0.190476	0.126437	0.111111	0.146067	0.22093	0.14433	0.115789	0.162791	0.139785	0.136364	0.243902	0.16129	0.191011	0.168539
Z4921678149	0.0754717	0.11	0.153846	0.0795455	0.177083	0.181818	0.106383	0.174312	0.116505	0.145833	0.0892857	0.0821918	0.115385	0.0970874	0.120482	0.106195	0.103774	0.132075	0.0833333	0.110092	0.179775	0.172043	0.151163	0.152174	0.15625	0.188235	0.11236	0.107527	0.197802	0.186047	0.135417	0.0927835	0.144444	0.122222	0.108696	0.170455	0.0978261	0.0957447	0.117021	0.186813	0.117647	0.10101	0.157303	0.123711	0.131868	0.206897	0.121212	0.135417	0.163043
Z4927219454	0.11215	0.115385	0.134021	0.0989011	0.145631	0.207921	0.123711	0.176991	0.121495	0.161616	0.123894	0.105263	0.108434	0.113208	0.152941	0.12069	0.119266	0.116071	0.147368	0.115044	0.208791	0.212766	0.195402	0.15625	0.16	0.277108	0.142857	0.113402	0.1875	0.175824	0.151515	0.14433	0.113402	0.152174	0.126316	0.173913	0.12766	0.136842	0.145833	0.153061	0.133333	0.117647	0.2	0.163265	0.16129	0.157895	0.148515	0.163265	0.154639
Z4927221021	0.181818	0.14	0.16129	0.126437	0.16	0.142857	0.126316	0.201835	0.113208	0.189474	0.168224	0.0789474	0.111111	0.171717	0.116279	0.153153	0.165049	0.205882	0.103093	0.148148	0.148936	0.12	0.146067	0.147368	0.128713	0.142857	0.133333	0.139785	0.142857	0.206897	0.166667	0.159574	0.139785	0.130435	0.153846	0.152174	0.155556	0.152174	0.113402	0.233333	0.114286	0.108911	0.12766	0.166667	0.177778	0.227273	0.163265	0.178947	0.182796
Z4927221908	0.117647	0.14433	0.235294	0.091954	0.153061	0.147059	0.142857	0.174312	0.0747664	0.134021	0.119266	0.0394737	0.0875	0.107843	0.309859	0.116071	0.125	0.142857	0.142857	0.12037	0.166667	0.135417	0.164706	0.164835	0.121212	0.122222	0.302632	0.183908	0.135417	0.186047	0.238636	0.247059	0.256098	0.246914	0.214286	0.303797	0.246914	0.211765	0.280488	0.186813	0.252747	0.252874	0.240964	0.329268	0.22619	0.179775	0.233333	0.238636	0.229885
[truncated: 164 more columns]
